# Supplementary material for: Phenotype and molecular signature of CD8+ T cell subsets in T cell- mediated rejections after kidney transplantation
Source: PubMed Central journal article supplement (PMC7292394; doi:10.1371/journal.pone.0234323), 2020-06-12
Supplement: pone.0234323.s002.pdf [file pone.0234323.s002.pdf]

**Supplementary Table 1. Significantly changed genes along ex vivo CCR7<sup>+</sup>CD8<sup>+</sup>T cells**

| Gene symbol | Score(d) | q-value (%) |
|-------------|----------|-------------|
| CA6         | 3.957    | 0           |
| MGC15705    | 3.708    | 0           |
| EDAR        | 3.674    | 0           |
| RAB3IP      | 3.625    | 0           |
| C2orf40     | 3.605    | 0           |
| NOG         | 3.585    | 0           |
| GCNT4       | 3.442    | 0           |
| ACACB       | 3.401    | 0           |
| LEF1        | 3.38     | 0           |
| TFDP3       | 3.335    | 4.136       |
| C2orf89     | 3.264    | 4.136       |
| ACVR1C      | 3.161    | 4.136       |
| LRRN3       | 3.147    | 4.136       |

+13 / -0
