# Supplementary material for: Phenotype and molecular signature of CD8+ T cell subsets in T cell- mediated rejections after kidney transplantation
Source: PubMed Central journal article supplement (PMC7292394; doi:10.1371/journal.pone.0234323), 2020-06-12
Supplement: pone.0234323.s003.pdf [file pone.0234323.s003.pdf]

**Supplementary Table 2. Significantly changed genes along ex vivo CCR7<sup>+</sup>CD45RA<sup>+</sup>CD8<sup>+</sup>T cells**

| Gene Symbol | Score (d) | q-value (%) |
|-------------|-----------|-------------|
| ITPRIPL1    | 4.373     | 0           |
| B3GAT1      | 4.258     | 0           |
| MMP23B      | 4.061     | 0           |
| PPP2R2B     | 4.058     | 0           |
| KLRD1       | 3.826     | 0           |
| GPR56       | 3.780     | 0           |
| PLEKHF1     | 3.748     | 0           |
| LAG3        | 3.644     | 0           |
| CA6         | -3.654    | 0           |
| GAL3ST4     | -3.552    | 0           |
| HAR1B       | -3.537    | 0           |

+8 / -3
