# Supplementary material for: Phenotype and molecular signature of CD8+ T cell subsets in T cell- mediated rejections after kidney transplantation
Source: PubMed Central journal article supplement (PMC7292394; doi:10.1371/journal.pone.0234323), 2020-06-12
Supplement: pone.0234323.s004.pdf [file pone.0234323.s004.pdf]

**Supplementary Table 3. Significantly changed genes along ex vivo CD28<sup>null</sup>CD57<sup>+</sup>CD8<sup>+</sup>T cells**

| Gene Symbol | Score (d) | q-value (%) |
|-------------|-----------|-------------|
| ITPRIPL1    | 4.672     | 0           |
| LAG3        | 4.622     | 0           |
| CCDC157     | 4.543     | 0           |
| MMP23B      | 4.410     | 0           |
| MATK        | 4.320     | 0           |
| TARP        | 4.301     | 0           |
| B3GAT1      | 4.216     | 0           |
| CLIC3       | 4.075     | 0           |
| PRAMEF11    | 4.064     | 0           |
| RGNEF       | 4.034     | 0           |
| CEND1       | 3.983     | 0           |
| RAB11FIP5   | 3.895     | 0           |
| OR10H2      | 3.771     | 0           |
| TTC16       | 3.751     | 0           |
| ATP9A       | 3.692     | 0           |
| ABCB5       | 3.671     | 0           |
| ABI3        | 3.660     | 0           |
| KIF19       | 3.660     | 0           |
| NBEAL2      | 3.647     | 0           |
| GPR56       | 3.633     | 0           |
| MAPT        | 3.583     | 0           |
| CHST13      | 3.575     | 0           |
| BDKRB1      | 3.559     | 0           |
| OR7E156P    | 3.542     | 0           |
| CD8A        | 3.533     | 0           |
| TMEM179     | 3.487     | 2.46        |
| CACNA2D2    | 3.480     | 2.46        |
| PPP2R2B     | 3.476     | 2.46        |
| Q93YZ4      | 3.461     | 2.46        |
| ATP6AP1L    | 3.455     | 2.46        |
| C1orf21     | 3.439     | 2.46        |
| TPTE2       | 3.435     | 2.46        |
| TBX1        | 3.430     | 2.46        |
| KLHL35      | 3.420     | 2.46        |
| KLRD1       | 3.419     | 2.46        |
| ASCL2       | 3.372     | 2.46        |
| PASD1       | 3.372     | 2.46        |

|          |       |      |
|----------|-------|------|
| GPX1     | 3.365 | 2.46 |
| C19orf12 | 3.349 | 2.46 |
| NPTX1    | 3.340 | 2.46 |
| RAPSN    | 3.336 | 2.46 |
| C12orf75 | 3.332 | 2.46 |
| EVPLL    | 3.331 | 2.46 |
| HES6     | 3.317 | 2.46 |
| FLRT3    | 3.314 | 2.46 |
| RDH13    | 3.309 | 2.46 |
| PDGFRB   | 3.307 | 2.46 |
| C19orf25 | 3.296 | 2.46 |
| LIMK1    | 3.295 | 2.46 |
| ABCA3    | 3.292 | 2.46 |
| SEC14L3  | 3.290 | 2.46 |
| SMAD7    | 3.273 | 2.46 |
| FLJ46020 | 3.273 | 2.46 |
| ITGAL    | 3.270 | 2.46 |
| FOXD1    | 3.269 | 2.46 |
| NAMA     | 3.267 | 2.46 |
| OR1S1    | 3.267 | 2.46 |
| NTHL1    | 3.242 | 2.46 |
| CD27     | 3.239 | 2.46 |
| PLAC1    | 3.233 | 2.46 |
| NAPA     | 3.227 | 2.46 |
| ACTL7A   | 3.223 | 2.46 |
| MYH10    | 3.223 | 2.46 |
| ZDHHC24  | 3.202 | 2.46 |
| ATF3     | 3.196 | 2.46 |
| IRX4     | 3.168 | 2.46 |
| MB21D1   | 3.167 | 2.46 |
| ZNF333   | 3.160 | 2.46 |
| GPAA1    | 3.158 | 2.46 |
| MRGPRG   | 3.154 | 2.46 |
| FGF17    | 3.153 | 2.46 |
| ZBTB3    | 3.150 | 2.46 |
| ICAM5    | 3.144 | 2.46 |
| CD81     | 3.135 | 2.46 |
| CEP78    | 3.133 | 2.46 |
| AHRR     | 3.123 | 2.46 |

|            |       |      |
|------------|-------|------|
| C19orf22   | 3.120 | 2.46 |
| TFDP2      | 3.108 | 2.46 |
| CST7       | 3.106 | 2.46 |
| TM4SF19    | 3.088 | 2.46 |
| DPP3       | 3.084 | 2.46 |
| ESCO2      | 3.080 | 2.46 |
| CD70       | 3.079 | 2.46 |
| CASZ1      | 3.076 | 2.46 |
| DDX49      | 3.066 | 2.46 |
| MIR205HG   | 3.063 | 2.46 |
| AMOTL1     | 3.058 | 2.46 |
| B4GALT7    | 3.058 | 2.46 |
| GNLY       | 3.055 | 2.46 |
| BOK        | 3.051 | 2.46 |
| IL17REL    | 3.048 | 2.46 |
| MUC8       | 3.048 | 2.46 |
| OR7E12P    | 3.042 | 2.46 |
| OPRD1      | 3.040 | 2.46 |
| PLEKHF1    | 3.036 | 2.46 |
| TMEM95     | 3.036 | 2.46 |
| TNFRSF11B  | 3.036 | 2.46 |
| C16orf45   | 3.034 | 2.46 |
| SEMA7A     | 3.028 | 2.46 |
| SPEM1      | 3.024 | 2.46 |
| GFRA3      | 3.021 | 2.46 |
| OR7E14P    | 3.015 | 2.46 |
| PRIMA1     | 3.014 | 2.46 |
| PYROXD2    | 3.013 | 2.46 |
| GALK1      | 3.008 | 2.46 |
| BEAN1      | 3.005 | 2.46 |
| MYO1G      | 3.004 | 2.46 |
| FOXH1      | 3.000 | 2.46 |
| HOXA11-AS1 | 2.999 | 2.46 |
| WNT4       | 2.992 | 2.46 |
| BPMS       | 2.990 | 2.46 |
| CHAT       | 2.987 | 2.46 |
| ADARB2-AS1 | 2.986 | 2.46 |
| MT1E       | 2.983 | 2.46 |
| FSCN2      | 2.982 | 2.46 |

|          |        |      |
|----------|--------|------|
| FLJ34208 | 2.968  | 2.46 |
| PDZRN3   | 2.967  | 2.46 |
| TBC1D7   | 2.967  | 2.46 |
| ADM2     | 2.966  | 2.46 |
| BAHCC1   | 2.964  | 2.46 |
| KCNK1    | 2.962  | 2.46 |
| INSL3    | 2.962  | 2.46 |
| PDIA2    | 2.960  | 2.46 |
| OR4K14   | 2.959  | 2.46 |
| PLAG1    | -4.151 | 0    |
| GAL3ST4  | -4.070 | 0    |
| PLCL1    | -4.010 | 0    |
| FAM134B  | -3.679 | 2.46 |
| EFHC2    | -3.585 | 2.46 |
| LEF1     | -3.543 | 2.46 |
| KRTAP5-6 | -3.510 | 2.46 |
| ZNF540   | -3.451 | 2.46 |
| PKIA     | -3.420 | 2.46 |
| NOG      | -3.418 | 2.46 |
| FAM153A  | -3.412 | 2.46 |
| FOXO1    | -3.403 | 2.46 |
| C2orf89  | -3.400 | 2.46 |
| ZNF471   | -3.391 | 2.46 |
| PDK1     | -3.341 | 2.46 |
| CEP41    | -3.338 | 2.46 |
| FBLN5    | -3.332 | 2.46 |
| MEST     | -3.324 | 2.46 |
| C2orf40  | -3.304 | 2.46 |

---

+ 124/ -19
