# Supplementary material for: Phenotype and molecular signature of CD8+ T cell subsets in T cell- mediated rejections after kidney transplantation
Source: PubMed Central journal article supplement (PMC7292394; doi:10.1371/journal.pone.0234323), 2020-06-12
Supplement: pone.0234323.s005.pdf [file pone.0234323.s005.pdf]

**Supplementary Table 4. Up-regulated genes in CCR7<sup>+</sup>CD8<sup>+</sup> T cells compared with CCR7<sup>-</sup>CD8<sup>+</sup> T cells.**

| Gene Accession  | Gene_Symbol | Gene Description                                                    | FC   |
|-----------------|-------------|---------------------------------------------------------------------|------|
| NM_001301714    | CCR7        | chemokine (C-C motif) receptor 7                                    | 23.5 |
| NM_002371       | MAL         | mal, T-cell differentiation protein                                 | 21.9 |
| NM_001099658    | LRRN3       | leucine rich repeat neuronal 3                                      | 19.1 |
| NM_001037535    | SCML1       | sex comb on midleg-like 1 (Drosophila)                              | 14.2 |
| NM_001130713    | LEF1        | lymphoid enhancer-binding factor 1                                  | 13.0 |
| NM_020404       | CD248       | CD248 molecule, endosialin                                          | 12.9 |
| ENST00000360669 | FAM153A     | family with sequence similarity 153, member A                       | 11.1 |
| NM_001145107    | NELL2       | neural EGFL like 2                                                  | 9.8  |
| NM_001293274    | CACHD1      | cache domain containing 1                                           | 8.0  |
| NM_004948       | DSC1        | desmocollin 1                                                       | 6.8  |
| NM_001102       | ACTN1       | actinin, alpha 1                                                    | 6.8  |
| NR_029373       | LEF1-AS1    | LEF1 antisense RNA 1                                                | 6.6  |
| NM_016591       | GCNT4       | glucosaminyl (N-acetyl) transferase 4, core 2                       | 6.1  |
| NM_001037132    | NRCAM       | neuronal cell adhesion molecule                                     | 6.1  |
| NM_001170794    | BACH2       | BTB and CNC homology 1, basic leucine zipper transcription factor 2 | 5.8  |
| NM_001174071    | SERINC5     | serine incorporator 5                                               | 5.8  |
| NM_001190981    | IL6ST       | interleukin 6 signal transducer                                     | 5.7  |
| NM_000565       | IL6R        | interleukin 6 receptor                                              | 5.3  |
| NM_001173977    | LRRC16A     | leucine rich repeat containing 16A                                  | 5.1  |
| NM_001251977    | RCAN3       | RCAN family member 3                                                | 5.0  |
| NM_001256482    | EPHX2       | epoxide hydrolase 2, cytoplasmic                                    | 4.9  |
| NM_003498       | SNN         | stannin                                                             | 4.9  |
| NM_003196       | TCEA3       | transcription elongation factor A (SII), 3                          | 4.8  |
| NM_001168647    | CNKSR2      | connector enhancer of kinase suppressor of Ras 2                    | 4.8  |

|                    |            |                                                                       |     |
|--------------------|------------|-----------------------------------------------------------------------|-----|
| NM_002737          | PRKCA      | protein kinase C, alpha                                               | 4.6 |
| NM_001256850       | TTN        | titin                                                                 | 4.6 |
| NR_103776          | CHRM3-AS2  | CHRM3 antisense RNA 2                                                 | 4.5 |
| NM_001080824       | TRABD2A    | TraB domain containing 2A                                             | 4.5 |
| NM_001289010       | MAN1C1     | mannosidase, alpha, class 1C, member 1                                | 4.5 |
| NM_032160          | DSEL       | dermatan sulfate epimerase-like                                       | 4.3 |
| NM_024637          | GAL3ST4    | galactose-3-O-sulfotransferase 4                                      | 4.3 |
| NM_001170553       | VSIG1      | V-set and immunoglobulin domain containing 1                          | 4.1 |
| NM_173511          | FAM117B    | family with sequence similarity 117, member B                         | 4.1 |
| NM_003737          | DCHS1      | dachsous cadherin-related 1                                           | 4.1 |
| NM_001243254       | DENND5A    | DENN/MADD domain containing 5A                                        | 4.0 |
| NM_001204813       | NT5E       | 5-nucleotidase, ecto (CD73)                                           | 4.0 |
| NM_001287005       | SUSD3      | sushi domain containing 3                                             | 3.9 |
| NM_031469          | SH3BGRL2   | SH3 domain binding glutamate-rich protein like 2                      | 3.9 |
| NR_036521          | ZNF667-AS1 | ZNF667 antisense RNA 1 (head to head)                                 | 3.9 |
| NM_032427          | MAML2      | mastermind-like transcriptional coactivator 2                         | 3.9 |
| NM_001278549       | PDK1       | pyruvate dehydrogenase kinase, isozyme 1                              | 3.8 |
| NM_001270942       | KLF7       | Kruppel-like factor 7 (ubiquitous)                                    | 3.8 |
| NM_001144952       | SDK2       | sidekick cell adhesion molecule 2                                     | 3.7 |
| OTTHUMT00000410945 | TRAJ53     | T cell receptor alpha joining 53                                      | 3.6 |
| NR_045407          | RCAN3AS    | RCAN3 antisense                                                       | 3.6 |
| NM_018593          | SLC16A10   | solute carrier family 16 (aromatic amino acid transporter), member 10 | 3.6 |
| NM_001060          | TBXA2R     | thromboxane A2 receptor                                               | 3.5 |
| OTTHUMT00000351233 | TRBV9      | T cell receptor beta variable 9                                       | 3.5 |

|                 |           |                                                                                    |     |
|-----------------|-----------|------------------------------------------------------------------------------------|-----|
| NM_001035254    | FAM102A   | family with sequence similarity 102, member A                                      | 3.5 |
| NM_016224       | SNX9      | sorting nexin 9                                                                    | 3.5 |
| NM_001215       | CA6       | carbonic anhydrase VI                                                              | 3.4 |
| NM_001267036    | SLC7A8    | solute carrier family 7 (amino acid transporter light chain, L system), member 8   | 3.4 |
| NM_001098815    | TESPA1    | thymocyte expressed, positive selection associated 1                               | 3.3 |
| NM_003863       | DPM2      | dolichyl-phosphate mannosyltransferase polypeptide 2, regulatory subunit           | 3.3 |
| NM_005450       | NOG       | noggin                                                                             | 3.3 |
| XM_011520383    | ATHL1     | ATH1, acid trehalase-like 1 (yeast)                                                | 3.3 |
| NM_000655       | SELL      | selectin L                                                                         | 3.3 |
| NM_001316745    | CCDC141   | coiled-coil domain containing 141                                                  | 3.2 |
| NM_021095       | SLC5A6    | solute carrier family 5 (sodium/multivitamin and iodide cotransporter), member 6   | 3.2 |
| NM_001114634    | PLAG1     | pleiomorphic adenoma gene 1                                                        | 3.2 |
| NM_130446       | KLHL6     | kelch-like family member 6                                                         | 3.2 |
| NM_001134851    | TCF7      | transcription factor 7 (T-cell specific, HMG-box)                                  | 3.2 |
| NR_029832       | MIR29C    | microRNA 29c                                                                       | 3.2 |
| NM_022336       | EDAR      | ectodysplasin A receptor                                                           | 3.1 |
| NM_001076785    | SLC7A6    | solute carrier family 7 (amino acid transporter light chain, y+L system), member 6 | 3.1 |
| ENST00000586713 | CEP295NL  | CEP295 N-terminal like                                                             | 3.1 |
| NM_001307952    | HAPLN3    | hyaluronan and proteoglycan link protein 3                                         | 3.1 |
| NM_001172435    | RAB3GAP1  | RAB3 GTPase activating protein subunit 1 (catalytic)                               | 3.1 |
| NM_001256126    | CERS6     | ceramide synthase 6                                                                | 3.1 |
| NM_001145426    | YBX3      | Y box binding protein 3                                                            | 3.1 |
| NM_001080437    | SNED1     | sushi, nidogen and EGF-like domains 1                                              | 3.1 |
| NR_103784       | ITPKB-IT1 | ITPKB intronic transcript 1                                                        | 3.1 |

|                    |               |                                                                             |     |
|--------------------|---------------|-----------------------------------------------------------------------------|-----|
| OTTHUMT00000410959 | TRAJ39        | T cell receptor alpha joining 39                                            | 3.1 |
| NM_001256541       | TMEM204       | transmembrane protein 204                                                   | 3.1 |
| NM_001271856       | GRASP         | GRP1 (general receptor for phosphoinositides 1)-associated scaffold protein | 3.1 |
| NM_001265615       | FAM153B       | family with sequence similarity 153, member B                               | 3.0 |
| NM_001006658       | CR2           | complement component (3d/Epstein Barr virus) receptor 2                     | 3.0 |
| NM_203411          | TMEM88        | transmembrane protein 88                                                    | 3.0 |
| NM_015888          | HOOK1         | hook microtubule-tethering protein 1                                        | 3.0 |
| NM_001130172       | MYB           | v-myb avian myeloblastosis viral oncogene homolog                           | 3.0 |
| NM_052847          | GNG7          | guanine nucleotide binding protein (G protein), gamma 7                     | 3.0 |
| NM_001271594       | SESN3         | sestrin 3                                                                   | 3.0 |
| NM_001260489       | LSR           | lipolysis stimulated lipoprotein receptor                                   | 2.9 |
| NM_152272          | CHMP7         | charged multivesicular body protein 7                                       | 2.9 |
| NM_000922          | PDE3B         | phosphodiesterase 3B, cGMP-inhibited                                        | 2.9 |
| ENST00000532740    | PDE3B         | phosphodiesterase 3B, cGMP-inhibited                                        | 2.9 |
| NM_001033045       | GPR155        | G protein-coupled receptor 155                                              | 2.9 |
| NM_002518          | NPAS2         | neuronal PAS domain protein 2                                               | 2.9 |
| NM_001003407       | ABLIM1        | actin binding LIM protein 1                                                 | 2.9 |
| NM_138381          | OXNAD1        | oxidoreductase NAD-binding domain containing 1                              | 2.8 |
| NR_109930          | CTD-2201I18.1 | uncharacterized LOC101929215                                                | 2.8 |
| NM_012093          | AK5           | adenylate kinase 5                                                          | 2.8 |
| NM_015394          | ZNF10         | zinc finger protein 10                                                      | 2.8 |
| NM_001345          | DGKA          | diacylglycerol kinase alpha                                                 | 2.8 |
| NR_039641          | MIR4439       | microRNA 4439                                                               | 2.8 |

|              |           |                                                                 |     |
|--------------|-----------|-----------------------------------------------------------------|-----|
| NM_000875    | IGF1R     | insulin-like growth factor 1 receptor                           | 2.8 |
| NR_023382    | ZNF815P   | zinc finger protein 815, pseudogene                             | 2.8 |
| NM_144770    | RBM11     | RNA binding motif protein 11                                    | 2.8 |
| NM_003447    | ZNF165    | zinc finger protein 165                                         | 2.8 |
| NR_036502    | PRKCQ-AS1 | PRKCQ antisense RNA 1                                           | 2.8 |
| NM_001012505 | FOXP1     | forkhead box P1                                                 | 2.8 |
| NM_001190259 | GCSAM     | germinal center-associated, signaling and motility              | 2.8 |
| NM_006909    | RASGRF2   | Ras protein-specific guanine nucleotide-releasing factor 2      | 2.7 |
| NM_006613    | GRAP      | GRB2-related adaptor protein                                    | 2.7 |
| NM_001039508 | SIRPG     | signal-regulatory protein gamma                                 | 2.7 |
| NM_001079906 | ZNF331    | zinc finger protein 331                                         | 2.7 |
| NM_014059    | RGCC      | regulator of cell cycle                                         | 2.7 |
| NM_001034850 | FAM134B   | family with sequence similarity 134, member B                   | 2.7 |
| NM_001204197 | NBEA      | neurobeachin                                                    | 2.7 |
| NR_033897    | EPHA1-AS1 | EPHA1 antisense RNA 1                                           | 2.7 |
| NM_001164443 | ANKRD31   | ankyrin repeat domain 31                                        | 2.7 |
| NM_003711    | PLPP1     | phospholipid phosphatase 1                                      | 2.7 |
| NM_004326    | BCL9      | B-cell CLL/lymphoma 9                                           | 2.7 |
| NM_007079    | PTP4A3    | protein tyrosine phosphatase type IVA, member 3                 | 2.7 |
| NM_001005339 | RGS10     | regulator of G-protein signaling 10                             | 2.7 |
| NM_212559    | XKRX      | X-linked Kx blood group related, X-linked                       | 2.7 |
| NM_030571    | NDFIP1    | Nedd4 family interacting protein 1                              | 2.6 |
| NM_000218    | KCNQ1     | potassium channel, voltage gated KQT-like subfamily Q, member 1 | 2.6 |
| NM_005232    | EPHA1     | EPH receptor A1                                                 | 2.6 |
| NM_001130414 | APBA2     | amyloid beta (A4) precursor protein-binding, family A, member 2 | 2.6 |

|                    |            |                                                                              |     |
|--------------------|------------|------------------------------------------------------------------------------|-----|
| NM_025092          | ATHL1      | ATH1, acid trehalase-like 1 (yeast)                                          | 2.6 |
| OTTHUMT00000410953 | TRAJ45     | T cell receptor alpha joining 45                                             | 2.6 |
| NR_037931          | ANAPC1P1   | anaphase promoting complex subunit 1 pseudogene 1                            | 2.6 |
| NM_000210          | ITGA6      | integrin alpha 6                                                             | 2.6 |
| XM_011517768       | GLIS3      | GLIS family zinc finger 3                                                    | 2.6 |
| XM_006710960       | LRRC8C     | leucine rich repeat containing 8 family, member C                            | 2.6 |
| OTTHUMT00000371928 | FAM153B    | family with sequence similarity 153, member B                                | 2.6 |
| NM_001783          | CD79A      | CD79a molecule, immunoglobulin-associated alpha                              | 2.6 |
| NM_006931          | SLC2A3     | solute carrier family 2 (facilitated glucose transporter), member 3          | 2.6 |
| NM_001204204       | SEC14L2    | SEC14-like lipid binding 2                                                   | 2.6 |
| NM_001164716       | PYGM       | phosphorylase, glycogen, muscle                                              | 2.6 |
| NM_002072          | GNAQ       | guanine nucleotide binding protein (G protein), q polypeptide                | 2.6 |
| NR_003317          | SNORD116-2 | small nucleolar RNA, C/D box 116-2                                           | 2.5 |
| NM_006272          | S100B      | S100 calcium binding protein B                                               | 2.5 |
| NM_014938          | MLXIP      | MLX interacting protein                                                      | 2.5 |
| NM_003890          | FCGBP      | Fc fragment of IgG binding protein                                           | 2.5 |
| NM_024758          | AGMAT      | agmatinase                                                                   | 2.5 |
| ENST00000423733    | PLCG1      | phospholipase C, gamma 1                                                     | 2.5 |
| NM_000574          | CD55       | CD55 molecule, decay accelerating factor for complement (Cromer blood group) | 2.5 |
| NM_019072          | SGTB       | small glutamine-rich tetratricopeptide repeat (TPR)-containing, beta         | 2.5 |
| NM_015351          | TTC9       | tetratricopeptide repeat domain 9                                            | 2.5 |

|                    |             |                                                         |     |
|--------------------|-------------|---------------------------------------------------------|-----|
| NM_001143819       | TPCN1       | two pore segment channel 1                              | 2.5 |
| NM_001253900       | MEST        | mesoderm specific transcript                            | 2.5 |
| NM_001309242       | MYO15B      | myosin XVB                                              | 2.5 |
| NM_001236          | CBR3        | carbonyl reductase 3                                    | 2.5 |
| NM_001145845       | ROBO1       | roundabout guidance receptor 1                          | 2.5 |
| NM_005164          | ABCD2       | ATP binding cassette subfamily D member 2               | 2.5 |
| NM_001085384       | ZNF154      | zinc finger protein 154                                 | 2.5 |
| NM_001277291       | ZNF891      | zinc finger protein 891                                 | 2.5 |
| NM_001032221       | STXBP1      | syntaxin binding protein 1                              | 2.5 |
| NM_005567          | LGALS3BP    | lectin, galactoside-binding, soluble, 3 binding protein | 2.5 |
| NM_001001567       | PDE9A       | phosphodiesterase 9A                                    | 2.5 |
| NM_001190482       | PCSK5       | proprotein convertase subtilisin/kexin type 5           | 2.5 |
| NM_001136180       | HSBP1L1     | heat shock factor binding protein 1-like 1              | 2.5 |
| NM_003749          | IRS2        | insulin receptor substrate 2                            | 2.5 |
| NR_003361          | SNORD116-28 | small nucleolar RNA, C/D box 116-28                     | 2.5 |
| NM_003328          | TXK         | TXK tyrosine kinase                                     | 2.5 |
| NM_006493          | CLN5        | ceroid-lipofuscinosis, neuronal 5                       | 2.4 |
| NR_003321          | SNORD116-6  | small nucleolar RNA, C/D box 116-6                      | 2.4 |
| NR_030353          | MIR623      | microRNA 623                                            | 2.4 |
| OTTHUMT00000410944 | TRAJ54      | T cell receptor alpha joining 54                        | 2.4 |
| NM_001281429       | PCED1B      | PC-esterase domain containing 1B                        | 2.4 |
| NR_029506          | MIR32       | microRNA 32                                             | 2.4 |
| NM_052916          | RNF157      | ring finger protein 157                                 | 2.4 |
| NM_207360          | ZC3H12D     | zinc finger CCCH-type containing 12D                    | 2.4 |
| XM_011519416       | ANKRD26     | ankyrin repeat domain 26                                | 2.4 |

|                    |             |                                                                       |     |
|--------------------|-------------|-----------------------------------------------------------------------|-----|
| ENST00000488284    | RASA4B      | RAS p21 protein activator 4B                                          | 2.4 |
| NM_001278359       | RHOH        | ras homolog family member H                                           | 2.4 |
| NM_024959          | SLC8B1      | solute carrier family 8 (sodium/lithium/calcium exchanger), member B1 | 2.4 |
| NR_003330          | SNORD116-15 | small nucleolar RNA, C/D box 116-15                                   | 2.4 |
| NR_037443          | MIR3671     | microRNA 3671                                                         | 2.4 |
| NM_001277          | CHKA        | choline kinase alpha                                                  | 2.4 |
| NM_002467          | MYC         | v-myc avian myelocytomatosis viral oncogene homolog                   | 2.4 |
| NM_001165412       | NFKB1       | nuclear factor of kappa light polypeptide gene enhancer in B-cells 1  | 2.4 |
| NM_001744          | CAMK4       | calcium/calmodulin-dependent protein kinase IV                        | 2.4 |
| NM_020741          | KIAA1257    | KIAA1257                                                              | 2.4 |
| NM_001135911       | PIK3IP1     | phosphoinositide-3-kinase interacting protein 1                       | 2.4 |
| NM_015627          | LDLRAP1     | low density lipoprotein receptor adaptor protein 1                    | 2.3 |
| NM_001102406       | ALPK1       | alpha kinase 1                                                        | 2.3 |
| NM_001242          | CD27        | CD27 molecule                                                         | 2.3 |
| BX647165           | TRAV20      | T cell receptor alpha variable 20                                     | 2.3 |
| NM_001204502       | FLT3LG      | fms-related tyrosine kinase 3 ligand                                  | 2.3 |
| NM_001286247       | RALGPS2     | Ral GEF with PH domain and SH3 binding motif 2                        | 2.3 |
| NM_032184          | SYDE2       | synapse defective 1, Rho GTPase, homolog 2 (C. elegans)               | 2.3 |
| NM_001083910       | SIRPB1      | signal-regulatory protein beta 1                                      | 2.3 |
| OTTHUMT00000401893 | TRAV8-4     | T cell receptor alpha variable 8-4                                    | 2.3 |
| NM_001135109       | RIC3        | RIC3 acetylcholine receptor chaperone                                 | 2.3 |
| NM_178563          | AGBL3       | ATP/GTP binding protein-like 3                                        | 2.3 |
| NM_001099410       | GPRASP1     | G protein-coupled receptor associated sorting protein 1               | 2.3 |



|                    |             |                                                              |     |
|--------------------|-------------|--------------------------------------------------------------|-----|
| NM_001134476       | LRRC8B      | leucine rich repeat containing 8 family, member B            | 2.3 |
| NR_002982          | SNORA54     | small nucleolar RNA, H/ACA box 54                            | 2.3 |
| NR_110542          | PIK3IP1-AS1 | PIK3IP1 antisense RNA 1 (head to head)                       | 2.3 |
| NM_001085357       | BTLA        | B and T lymphocyte associated                                | 2.3 |
| NM_001145304       | KIAA1683    | KIAA1683                                                     | 2.3 |
| NM_001005328       | OR2A7       | olfactory receptor, family 2, subfamily A, member 7          | 2.3 |
| NM_001164317       | FLNB        | filamin B, beta                                              | 2.3 |
| NM_001170755       | NBPF15      | neuroblastoma breakpoint family, member 15                   | 2.3 |
| NM_173354          | SIK1        | salt-inducible kinase 1                                      | 2.2 |
| NM_001114614       | MFGE8       | milk fat globule-EGF factor 8 protein                        | 2.2 |
| NM_024315          | TMEM243     | transmembrane protein 243, mitochondrial                     | 2.2 |
| NM_001276318       | PPP1R3E     | protein phosphatase 1, regulatory subunit 3E                 | 2.2 |
| NR_001290          | SNORD116-19 | small nucleolar RNA, C/D box 116-19                          | 2.2 |
| NR_001290          | SNORD116-19 | small nucleolar RNA, C/D box 116-19                          | 2.2 |
| NM_001128208       | LEPROTL1    | leptin receptor overlapping transcript-like 1                | 2.2 |
| NM_001282674       | NGFRAP1     | nerve growth factor receptor (TNFRSF16) associated protein 1 | 2.2 |
| AF400486           | SNRPN       | small nuclear ribonucleoprotein polypeptide N                | 2.2 |
| NM_001110798       | NAA16       | N(alpha)-acetyltransferase 16, NatA auxiliary subunit        | 2.2 |
| NR_030398          | MIR421      | microRNA 421                                                 | 2.2 |
| NM_001252119       | PASK        | PAS domain containing serine/threonine kinase                | 2.2 |
| XM_011516411       | PRSS1       | protease, serine, 1 (trypsin 1)                              | 2.2 |
| OTTHUMT00000410946 | TRAJ52      | T cell receptor alpha joining 52                             | 2.2 |
| NM_001100812       | CXCL16      | chemokine (C-X-C motif) ligand 16                            | 2.2 |
| NM_001129778       | GRAPL       | GRB2-related adaptor protein-like                            | 2.2 |

|                    |            |                                                                                           |     |
|--------------------|------------|-------------------------------------------------------------------------------------------|-----|
| NM_021915          | ZNF69      | zinc finger protein 69                                                                    | 2.2 |
| NR_026932          | PDCD4-AS1  | PDCD4 antisense RNA 1                                                                     | 2.2 |
| AF400486           | SNRPN      | small nuclear ribonucleoprotein polypeptide N                                             | 2.2 |
| NM_001251882       | VIPR1      | vasoactive intestinal peptide receptor 1                                                  | 2.2 |
| NM_001136501       | ZNF844     | zinc finger protein 844                                                                   | 2.2 |
| NM_001135648       | PTPRK      | protein tyrosine phosphatase, receptor type, K                                            | 2.2 |
| NM_001098623       | OBSCN      | obscurin, cytoskeletal calmodulin and titin-interacting RhoGEF                            | 2.2 |
| NM_004915          | ABCG1      | ATP binding cassette subfamily G member 1                                                 | 2.2 |
| NR_003047          | SNORD19    | small nucleolar RNA, C/D box 19                                                           | 2.2 |
| NM_001128931       | NAF1       | nuclear assembly factor 1 ribonucleoprotein                                               | 2.2 |
| NR_108047          | RNF139-AS1 | RNF139 antisense RNA 1 (head to head)                                                     | 2.2 |
| ENST00000558190    | ATXN3      | ataxin 3                                                                                  | 2.2 |
| NM_019050          | USP53      | ubiquitin specific peptidase 53                                                           | 2.1 |
| OTTHUMT00000409911 | TRAV26-2   | T cell receptor alpha variable 26-2                                                       | 2.1 |
| NM_002221          | ITPKB      | inositol-trisphosphate 3-kinase B                                                         | 2.1 |
| NM_003840          | TNFRSF10D  | tumor necrosis factor receptor superfamily, member 10d, decoy with truncated death domain | 2.1 |
| NM_001097622       | OCM        | oncomodulin                                                                               | 2.1 |
| XM_006723698       | ZNF831     | zinc finger protein 831                                                                   | 2.1 |
| NM_001005218       | OR5B21     | olfactory receptor, family 5, subfamily B, member 21                                      | 2.1 |
| AL832294           | ARHGEF1    | Rho guanine nucleotide exchange factor 1                                                  | 2.1 |
| NM_001289050       | SLC22A17   | solute carrier family 22, member 17                                                       | 2.1 |
| NM_001300735       | RASGEF1B   | RasGEF domain family member 1B                                                            | 2.1 |
| NM_005534          | IFNGR2     | interferon gamma receptor 2 (interferon gamma transducer 1)                               | 2.1 |
| NM_006823          | PKIA       | protein kinase (cAMP-dependent, catalytic) inhibitor alpha                                | 2.1 |

|              |          |                                                                   |     |
|--------------|----------|-------------------------------------------------------------------|-----|
| NM_022117    | TSPYL2   | TSPY-like 2                                                       | 2.1 |
| NM_152653    | UBE2E2   | ubiquitin conjugating enzyme E2E 2                                | 2.1 |
| NM_177437    | TAS2R60  | taste receptor, type 2, member 60                                 | 2.1 |
| AF400486     | SNRPN    | small nuclear ribonucleoprotein polypeptide N                     | 2.1 |
| NM_002114    | HIVEP1   | human immunodeficiency virus type I enhancer binding protein 1    | 2.1 |
| NM_053055    | THEM4    | thioesterase superfamily member 4                                 | 2.1 |
| NR_002157    | OR2A9P   | olfactory receptor, family 2, subfamily A, member 9 pseudogene    | 2.1 |
| NM_001010974 | BCAS4    | breast carcinoma amplified sequence 4                             | 2.1 |
| NR_037507    | MIR3942  | microRNA 3942                                                     | 2.1 |
| NM_001306080 | LMO7     | LIM domain 7                                                      | 2.1 |
| NM_017918    | CCDC109B | coiled-coil domain containing 109B                                | 2.1 |
| NM_001256732 | SSBP2    | single-stranded DNA binding protein 2                             | 2.1 |
| NM_001244    | TNFSF8   | tumor necrosis factor (ligand) superfamily, member 8              | 2.1 |
| NM_001297707 | CAMSAP2  | calmodulin regulated spectrin-associated protein family, member 2 | 2.1 |
| NM_015147    | CEP68    | centrosomal protein 68kDa                                         | 2.1 |
| NM_001099289 | SH3RF3   | SH3 domain containing ring finger 3                               | 2.1 |
| NM_001657    | AREG     | amphiregulin                                                      | 2.1 |
| NM_001131010 | SATB1    | SATB homeobox 1                                                   | 2.1 |
| NR_003697    | SNHG15   | small nucleolar RNA host gene 15                                  | 2.1 |
| NM_015042    | ZNF609   | zinc finger protein 609                                           | 2.1 |
| NM_020651    | PELI1    | pellino E3 ubiquitin protein ligase 1                             | 2.1 |
| NM_001081    | CUBN     | cubilin (intrinsic factor-cobalamin receptor)                     | 2.1 |
| NM_012092    | ICOS     | inducible T-cell co-stimulator                                    | 2.1 |
| NM_004625    | WNT7A    | wingless-type MMTV integration site family, member 7A             | 2.0 |

|                    |           |                                                                      |     |
|--------------------|-----------|----------------------------------------------------------------------|-----|
| NM_001024847       | TGFBR2    | transforming growth factor beta receptor II                          | 2.0 |
| ENST00000511560    | AREG      | amphiregulin                                                         | 2.0 |
| NM_001171137       | STRBP     | spermatid perinuclear RNA binding protein                            | 2.0 |
| NR_036191          | MIR4306   | microRNA 4306                                                        | 2.0 |
| OTTHUMT00000410951 | TRAJ47    | T cell receptor alpha joining 47                                     | 2.0 |
| NM_001080424       | KDM6B     | lysine (K)-specific demethylase 6B                                   | 2.0 |
| NM_001300949       | ZNF101    | zinc finger protein 101                                              | 2.0 |
| NM_014784          | ARHGEF11  | Rho guanine nucleotide exchange factor 11                            | 2.0 |
| AK095849           | SNHG1     | small nucleolar RNA host gene 1                                      | 2.0 |
| NM_001104595       | FAM118A   | family with sequence similarity 118, member A                        | 2.0 |
| NM_032873          | UBASH3B   | ubiquitin associated and SH3 domain containing B                     | 2.0 |
| NM_001004313       | TMEM220   | transmembrane protein 220                                            | 2.0 |
| NM_001304458       | PRMT9     | protein arginine methyltransferase 9                                 | 2.0 |
| NM_001012957       | DISC1     | disrupted in schizophrenia 1                                         | 2.0 |
| NM_001242318       | PDE7A     | phosphodiesterase 7A                                                 | 2.0 |
| NM_001135564       | HSF2      | heat shock transcription factor 2                                    | 2.0 |
| NM_001257194       | KLHL3     | kelch-like family member 3                                           | 2.0 |
| NM_000633          | BCL2      | B-cell CLL/lymphoma 2                                                | 2.0 |
| OTTHUMT00000409906 | TRAV29DV5 | T cell receptor alpha variable 29/delta variable 5 (gene/pseudogene) | 2.0 |
| NR_038353          | FAM153C   | family with sequence similarity 153, member C, pseudogene            | 2.0 |
| NM_022552          | DNMT3A    | DNA (cytosine-5-)-methyltransferase 3 alpha                          | 2.0 |
| NM_001307977       | WDR74     | WD repeat domain 74                                                  | 2.0 |
| NM_001031714       | INF2      | inverted formin, FH2 and WH2 domain containing                       | 2.0 |
| NM_020448          | NIPAL3    | NIPA-like domain containing 3                                        | 2.0 |
| NM_001172303       | MASTL     | microtubule associated serine/threonine kinase-like                  | 2.0 |
| NR_022008          | PWAR5     | Prader Willi/Angelman region RNA 5                                   | 2.0 |

|                    |         |                                                                                                      |     |
|--------------------|---------|------------------------------------------------------------------------------------------------------|-----|
| NR_022011          | PWARSN  | Prader Willi/Angelman region RNA, SNRPN neighbor                                                     | 2.0 |
| NM_001114171       | FOSB    | FBJ murine osteosarcoma viral oncogene homolog B                                                     | 2.0 |
| NM_016148          | SHANK1  | SH3 and multiple ankyrin repeat domains 1                                                            | 2.0 |
| NM_022355          | DPEP2   | dipeptidase 2                                                                                        | 2.0 |
| NM_001284239       | SARAF   | store-operated calcium entry-associated regulatory factor                                            | 2.0 |
| NM_173602          | DIP2B   | disco-interacting protein 2 homolog B                                                                | 2.0 |
| AF400486           | SNRPN   | small nuclear ribonucleoprotein polypeptide N                                                        | 2.0 |
| NM_001079524       | PAICS   | phosphoribosylaminoimidazole carboxylase, phosphoribosylaminoimidazole succinocarboxamide synthetase | 1.9 |
| NM_001008530       | LGMN    | legumain                                                                                             | 1.9 |
| NM_001042413       | GLIS3   | GLIS family zinc finger 3                                                                            | 1.9 |
| NM_000070          | CAPN3   | calpain 3                                                                                            | 1.9 |
| NR_003057          | SNORD69 | small nucleolar RNA, C/D box 69                                                                      | 1.9 |
| NM_001193270       | MSL3    | male-specific lethal 3 homolog (Drosophila)                                                          | 1.9 |
| OTTHUMT00000410976 | TRAJ22  | T cell receptor alpha joining 22                                                                     | 1.9 |
| NR_029616          | MIR187  | microRNA 187                                                                                         | 1.9 |
| NM_003596          | TPST1   | tyrosylprotein sulfotransferase 1                                                                    | 1.9 |
| NM_001098412       | GAGE13  | G antigen 13                                                                                         | 1.9 |
| NR_002923          | BCORP1  | BCL6 corepressor pseudogene 1                                                                        | 1.9 |
| NM_002167          | ID3     | inhibitor of DNA binding 3, dominant negative helix-loop-helix protein                               | 1.9 |
| NM_001042574       | CRTC3   | CREB regulated transcription coactivator 3                                                           | 1.9 |
| NM_005539          | INPP5A  | inositol polyphosphate-5-phosphatase A                                                               | 1.9 |
| AF400486           | SNRPN   | small nuclear ribonucleoprotein polypeptide N                                                        | 1.9 |
| NR_030364          | MIR634  | microRNA 634                                                                                         | 1.9 |
| NM_001144034       | TMEM25  | transmembrane protein 25                                                                             | 1.9 |

|                    |           |                                                                        |     |
|--------------------|-----------|------------------------------------------------------------------------|-----|
| NM_001164          | APBB1     | amyloid beta (A4) precursor protein-binding, family B, member 1 (Fe65) | 1.9 |
| NM_001202233       | NR4A1     | nuclear receptor subfamily 4, group A, member 1                        | 1.9 |
| NM_001174097       | LDHB      | lactate dehydrogenase B                                                | 1.9 |
| NM_001105539       | ZBTB10    | zinc finger and BTB domain containing 10                               | 1.9 |
| NM_014698          | TMEM63A   | transmembrane protein 63A                                              | 1.9 |
| NM_001146094       | FAN1      | FANCD2/FANCI-associated nuclease 1                                     | 1.9 |
| OTTHUMT00000410954 | TRAJ44    | T cell receptor alpha joining 44                                       | 1.9 |
| NM_001277335       | RASA4B    | RAS p21 protein activator 4B                                           | 1.9 |
| XM_011529753       | CHAF1B    | chromatin assembly factor 1, subunit B (p60)                           | 1.9 |
| NM_006578          | GNB5      | guanine nucleotide binding protein (G protein), beta 5                 | 1.9 |
| NM_001287036       | KIAA1958  | KIAA1958                                                               | 1.9 |
| NM_001005287       | OR2A1     | olfactory receptor, family 2, subfamily A, member 1                    | 1.9 |
| NM_000901          | NR3C2     | nuclear receptor subfamily 3, group C, member 2                        | 1.9 |
| NM_001171818       | PPARD     | peroxisome proliferator-activated receptor delta                       | 1.9 |
| OTTHUMT00000401872 | TRAV1-1   | T cell receptor alpha variable 1-1                                     | 1.9 |
| XM_006711826       | OBSCN     | obscurin, cytoskeletal calmodulin and titin-interacting RhoGEF         | 1.9 |
| NM_004073          | PLK3      | polo-like kinase 3                                                     | 1.9 |
| NM_015041          | CLUAP1    | clusterin associated protein 1                                         | 1.9 |
| NM_005646          | TARBP1    | TAR (HIV-1) RNA binding protein 1                                      | 1.9 |
| NM_006598          | SLC12A7   | solute carrier family 12 (potassium/chloride transporter), member 7    | 1.9 |
| AK057897           | CRHR1-IT1 | CRHR1 intronic transcript 1                                            | 1.9 |

|                 |           |                                                                     |     |
|-----------------|-----------|---------------------------------------------------------------------|-----|
| NR_038286       | PSMD6-AS2 | PSMD6 antisense RNA 2                                               | 1.9 |
| NM_176877       | INADL     | InaD-like (Drosophila)                                              | 1.9 |
| NM_001166103    | SPINT2    | serine peptidase inhibitor, Kunitz type, 2                          | 1.9 |
| NM_020451       | SEPN1     | selenoprotein N, 1                                                  | 1.9 |
| NM_001178100    | CD8B      | CD8b molecule                                                       | 1.9 |
| NR_002952       | SNORA9    | small nucleolar RNA, H/ACA box 9                                    | 1.9 |
| NM_001301054    | PCYOX1L   | prenylcysteine oxidase 1 like                                       | 1.9 |
| AF400486        | SNRPN     | small nuclear ribonucleoprotein polypeptide N                       | 1.9 |
| NM_138435       | FAM83F    | family with sequence similarity 83, member F                        | 1.9 |
| NR_030299       | MIR573    | microRNA 573                                                        | 1.9 |
| ENST00000622469 | ZNRD1-AS1 | ZNRD1 antisense RNA 1                                               | 1.9 |
| NM_001042494    | SLC12A6   | solute carrier family 12 (potassium/chloride transporter), member 6 | 1.9 |
| NM_001164114    | CASS4     | Cas scaffolding protein family member 4                             | 1.9 |
| NM_002568       | PABPC1    | poly(A) binding protein, cytoplasmic 1                              | 1.9 |
| ENST00000247815 | HELB      | helicase (DNA) B                                                    | 1.9 |
| NM_080603       | ZSWIM1    | zinc finger, SWIM-type containing 1                                 | 1.9 |
| NM_001199741    | GADD45A   | growth arrest and DNA-damage-inducible, alpha                       | 1.9 |
| NR_039778       | MIR4635   | microRNA 4635                                                       | 1.8 |
| NM_013240       | N6AMT1    | N-6 adenine-specific DNA methyltransferase 1 (putative)             | 1.8 |
| NM_001277285    | IGSF9B    | immunoglobulin superfamily, member 9B                               | 1.8 |

|                    |          |                                                    |     |
|--------------------|----------|----------------------------------------------------|-----|
| ENST00000473426    | ARHGAP15 | Rho GTPase activating protein 15                   | 1.8 |
| ENST00000285737    | LONP2    | lon peptidase 2, peroxisomal                       | 1.8 |
| NM_001164605       | FXYD5    | FXYD domain containing ion transport regulator 5   | 1.8 |
| NM_001253875       | UXS1     | UDP-glucuronate decarboxylase 1                    | 1.8 |
| NR_033347          | SNORA70E | small nucleolar RNA, H/ACA box 70E                 | 1.8 |
| NM_001013437       | SEH1L    | SEH1-like nucleoporin                              | 1.8 |
| NM_005546          | ITK      | IL2-inducible T-cell kinase                        | 1.8 |
| OTTHUMT00000410988 | TRAJ10   | T cell receptor alpha joining 10                   | 1.8 |
| NM_003463          | PTP4A1   | protein tyrosine phosphatase type IVA, member 1    | 1.8 |
| NM_001136199       | GRAMD1A  | GRAM domain containing 1A                          | 1.8 |
| NM_001012398       | AKTIP    | AKT interacting protein                            | 1.8 |
| NM_001270960       | NOSIP    | nitric oxide synthase interacting protein          | 1.8 |
| NM_024989          | PGAP1    | post-GPI attachment to proteins 1                  | 1.8 |
| AF319524           | SNRPN    | small nuclear ribonucleoprotein polypeptide N      | 1.8 |
| NM_002229          | JUNB     | jun B proto-oncogene                               | 1.8 |
| NR_037498          | MIR3934  | microRNA 3934                                      | 1.8 |
| AF400487           | SNRPN    | small nuclear ribonucleoprotein polypeptide N      | 1.8 |
| NM_022754          | SFXN1    | sideroflexin 1                                     | 1.8 |
| NM_001287529       | MFSD12   | major facilitator superfamily domain containing 12 | 1.8 |
| NM_001198978       | SMAP2    | small ArfGAP2                                      | 1.8 |



|                    |             |                                                                                                              |     |
|--------------------|-------------|--------------------------------------------------------------------------------------------------------------|-----|
| XM_005250085       | RASA4B      | RAS p21 protein activator 4B                                                                                 | 1.8 |
| ENST00000504352    | PCBD2       | pterin-4 alpha-carbinolamine dehydratase/dimerization cofactor of hepatocyte nuclear factor 1 alpha (TCF1) 2 | 1.8 |
| NR_003329          | SNORD116-14 | small nucleolar RNA, C/D box 116-14                                                                          | 1.8 |
| NM_000276          | OCRL        | oculocerebrorenal syndrome of Lowe                                                                           | 1.8 |
| NR_039824          | MIR4677     | microRNA 4677                                                                                                | 1.8 |
| NM_001024956       | SC5D        | sterol-C5-desaturase                                                                                         | 1.8 |
| NM_001002255       | SUMO4       | small ubiquitin-like modifier 4                                                                              | 1.8 |
| NM_001004720       | NCK2        | NCK adaptor protein 2                                                                                        | 1.8 |
| NR_003584          | SNHG8       | small nucleolar RNA host gene 8                                                                              | 1.8 |
| NM_020405          | PLXDC1      | plexin domain containing 1                                                                                   | 1.8 |
| OTTHUMT00000410994 | TRAJ4       | T cell receptor alpha joining 4                                                                              | 1.8 |
| NM_001142784       | IL11RA      | interleukin 11 receptor, alpha                                                                               | 1.8 |
| NM_001136537       | BTBD19      | BTB (POZ) domain containing 19                                                                               | 1.8 |
| OTTHUMT00000401891 | TRAV13-1    | T cell receptor alpha variable 13-1                                                                          | 1.8 |
| NR_003360          | SNORD116-29 | small nucleolar RNA, C/D box 116-29                                                                          | 1.8 |
| NR_003326          | SNORD116-11 | small nucleolar RNA, C/D box 116-11                                                                          | 1.8 |
| NM_001005404       | YPEL2       | yippee like 2                                                                                                | 1.8 |
| NM_015395          | TECPR1      | tectonin beta-propeller repeat containing 1                                                                  | 1.7 |
| NM_012216          | MID2        | midline 2                                                                                                    | 1.7 |
| NM_178026          | GGT7        | gamma-glutamyltransferase 7                                                                                  | 1.7 |

|                    |          |                                                         |     |
|--------------------|----------|---------------------------------------------------------|-----|
| NR_039696          | MIR3689F | microRNA 3689f                                          | 1.7 |
| OTTHUMT00000399953 | SOD2     | superoxide dismutase 2, mitochondrial                   | 1.7 |
| OTTHUMT00000401888 | TRAV12-1 | T cell receptor alpha variable 12-1                     | 1.7 |
| NR_003367          | PVT1     | Pvt1 oncogene (non-protein coding)                      | 1.7 |
| NM_003033          | ST3GAL1  | ST3 beta-galactoside alpha-2,3-sialyltransferase 1      | 1.7 |
| NR_103741          | IPO5P1   | importin 5 pseudogene 1                                 | 1.7 |
| NM_001304507       | ZBTB25   | zinc finger and BTB domain containing 25                | 1.7 |
| AF086543           | CD44     | CD44 molecule (Indian blood group)                      | 1.7 |
| AF400486           | SNRPN    | small nuclear ribonucleoprotein polypeptide N           | 1.7 |
| NM_002015          | FOXO1    | forkhead box O1                                         | 1.7 |
| NM_014400          | LYPD3    | LY6/PLAUR domain containing 3                           | 1.7 |
| NR_024034          | CLUHP3   | clustered mitochondria (cluA/CLU1) homolog pseudogene 3 | 1.7 |
| NM_001165258       | TMEM14C  | transmembrane protein 14C                               | 1.7 |
| NM_001142473       | FCMR     | Fc fragment of IgM receptor                             | 1.7 |
| NR_002327          | SNORA10  | small nucleolar RNA, H/ACA box 10                       | 1.7 |
| NM_001080425       | BEX4     | brain expressed X-linked 4                              | 1.7 |
| NM_001001895       | UBASH3A  | ubiquitin associated and SH3 domain containing A        | 1.7 |
| NM_021078          | KAT2A    | K(lysine) acetyltransferase 2A                          | 1.7 |
| NM_001307924       | NAP1L1   | nucleosome assembly protein 1-like 1                    | 1.7 |
| NM_001127399       | YPEL5    | yippee like 5                                           | 1.7 |

|                 |           |                                                                                                                  |     |
|-----------------|-----------|------------------------------------------------------------------------------------------------------------------|-----|
| NM_014611       | MDN1      | midasin AAA ATPase 1                                                                                             | 1.7 |
| NR_125803       | SATB1-AS1 | SATB1 antisense RNA 1                                                                                            | 1.7 |
| NM_152405       | JMY       | junction mediating and regulatory protein, p53 cofactor                                                          | 1.7 |
| NM_001130955    | ARHGEF18  | Rho/Rac guanine nucleotide exchange factor 18                                                                    | 1.7 |
| NM_006981       | NR4A3     | nuclear receptor subfamily 4, group A, member 3                                                                  | 1.7 |
| NM_001130048    | DOCK9     | dedicator of cytokinesis 9                                                                                       | 1.7 |
| XM_011530938    | ZC3H12B   | zinc finger CCCH-type containing 12B                                                                             | 1.7 |
| ENST00000274242 | RPL37     | ribosomal protein L37                                                                                            | 1.7 |
| NM_001286631    | RBM26     | RNA binding motif protein 26                                                                                     | 1.7 |
| NM_001286262    | TCP11L2   | t-complex 11, testis-specific-like 2                                                                             | 1.7 |
| NM_000418       | IL4R      | interleukin 4 receptor                                                                                           | 1.7 |
| NM_001142287    | SEMA4D    | sema domain, immunoglobulin domain (Ig), transmembrane domain (TM) and short cytoplasmic domain, (semaphorin) 4D | 1.6 |
| NM_003291       | TPP2      | tripeptidyl peptidase II                                                                                         | 1.6 |
| NM_001014436    | DBNL      | drebrin-like                                                                                                     | 1.6 |
| NM_016584       | IL23A     | interleukin 23, alpha subunit p19                                                                                | 1.6 |
| NM_001098200    | GPR18     | G protein-coupled receptor 18                                                                                    | 1.6 |
| NM_015986       | CRLF3     | cytokine receptor-like factor 3                                                                                  | 1.6 |
| NR_002779       | NUDT9P1   | nudix hydrolase 9 pseudogene 1                                                                                   | 1.6 |
| NR_037482       | MIR3918   | microRNA 3918                                                                                                    | 1.6 |
| NM_001293735    | LYRM7     | LYR motif containing 7                                                                                           | 1.6 |

|                    |             |                                                       |     |
|--------------------|-------------|-------------------------------------------------------|-----|
| NR_047032          | SNORD116-30 | small nucleolar RNA, C/D box 116-30                   | 1.6 |
| NR_046084          | SH3BP5-AS1  | SH3BP5 antisense RNA 1                                | 1.6 |
| NM_005252          | FOS         | FBJ murine osteosarcoma viral oncogene homolog        | 1.6 |
| ENST00000610952    | CD24        | CD24 molecule                                         | 1.6 |
| NM_014366          | GNL3        | guanine nucleotide binding protein-like 3 (nucleolar) | 1.6 |
| AK054610           | SRSF1       | serine/arginine-rich splicing factor 1                | 1.6 |
| NR_039760          | MIR378I     | microRNA 378i                                         | 1.6 |
| NR_046579          | CACNA1C-AS2 | CACNA1C antisense RNA 2                               | 1.6 |
| NM_017592          | MED29       | mediator complex subunit 29                           | 1.6 |
| NM_178868          | CMTM8       | CKLF-like MARVEL transmembrane domain containing 8    | 1.6 |
| NM_001009          | RPS5        | ribosomal protein S5                                  | 1.6 |
| OTTHUMT00000410964 | TRAJ34      | T cell receptor alpha joining 34                      | 1.5 |
| AF400486           | SNRPN       | small nuclear ribonucleoprotein polypeptide N         | 1.5 |
| BC025727           | TRAV20      | T cell receptor alpha variable 20                     | 1.5 |
| NM_001285549       | ZDBF2       | zinc finger, DBF-type containing 2                    | 1.5 |
| NM_001004304       | ZNF740      | zinc finger protein 740                               | 1.5 |
| OTTHUMT00000351238 | TRBV2       | T cell receptor beta variable 2                       | 1.5 |
| NM_006186          | NR4A2       | nuclear receptor subfamily 4, group A, member 2       | 1.5 |

---
