# Supplementary material for: Phenotype and molecular signature of CD8+ T cell subsets in T cell- mediated rejections after kidney transplantation
Source: PubMed Central journal article supplement (PMC7292394; doi:10.1371/journal.pone.0234323), 2020-06-12
Supplement: pone.0234323.s006.pdf [file pone.0234323.s006.pdf]

**Supplementary Table 5. Down-regulated genes in CCR7<sup>+</sup>CD8<sup>+</sup> T cells compared with CCR7<sup>-</sup>CD8<sup>+</sup> T cells.**

| <b>Gene Accession</b> | <b>Gene_Symbol</b> | <b>Gene Description</b>                                                                  | <b>FC</b>    |
|-----------------------|--------------------|------------------------------------------------------------------------------------------|--------------|
| NM_180991             | SLCO4C1            | solute carrier organic anion transporter family, member 4C1                              | <b>-19.0</b> |
| NM_001291822          | KLRF1              | killer cell lectin-like receptor subfamily F, member 1                                   | <b>-17.4</b> |
| NM_002258             | KLRB1              | killer cell lectin-like receptor subfamily B, member 1                                   | <b>-15.6</b> |
| NM_001270780          | GZMH               | granzyme H                                                                               | <b>-15.5</b> |
| NM_001145770          | ADGRG1             | adhesion G protein-coupled receptor G1                                                   | <b>-13.9</b> |
| NM_053282             | SH2D1B             | SH2 domain containing 1B                                                                 | <b>-13.7</b> |
| NM_003853             | IL18RAP            | interleukin 18 receptor accessory protein                                                | <b>-12.5</b> |
| OTTHUMT00000410933    | TRDJ4              | T cell receptor delta joining 4                                                          | <b>-12.2</b> |
| OTTHUMT00000410936    | TRDC               | T cell receptor delta constant                                                           | <b>-12.1</b> |
| NM_031950             | FGFBP2             | fibroblast growth factor binding protein 2                                               | <b>-10.7</b> |
| ENST00000628473       | ZEB2               | zinc finger E-box binding homeobox 2                                                     | <b>-10.6</b> |
| NM_144701             | IL23R              | interleukin 23 receptor                                                                  | <b>-10.4</b> |
| NM_002288             | LAIR2              | leukocyte-associated immunoglobulin-like receptor 2                                      | <b>-10.0</b> |
| NM_004131             | GZMB               | granzyme B                                                                               | <b>-9.9</b>  |
| NM_001081637          | LILRB1             | leukocyte immunoglobulin-like receptor, subfamily B (with TM and ITIM domains), member 1 | <b>-9.8</b>  |
| NM_002984             | CCL4               | chemokine (C-C motif) ligand 4                                                           | <b>-9.8</b>  |
| NM_001114396          | KLRD1              | killer cell lectin-like receptor subfamily D, member 1                                   | <b>-9.8</b>  |
| NM_000024             | ADRB2              | adrenoceptor beta 2, surface                                                             | <b>-9.2</b>  |
| NM_002661             | PLCG2              | phospholipase C, gamma 2 (phosphatidylinositol-specific)                                 | <b>-9.2</b>  |
| NM_005601             | NKG7               | natural killer cell granule protein 7                                                    | <b>-9.1</b>  |
| NM_001136536          | DTHD1              | death domain containing 1                                                                | <b>-9.0</b>  |

|                    |           |                                                                                 |      |
|--------------------|-----------|---------------------------------------------------------------------------------|------|
| NM_000632          | ITGAM     | integrin, alpha M (complement component 3 receptor 3 subunit)                   | -8.7 |
| NM_003783          | B3GALT2   | UDP-Gal:betaGlcNAc beta 1,3-galactosyltransferase 2                             | -8.7 |
| OTTHUMT00000410935 | TRDJ3     | T cell receptor delta joining 3                                                 | -8.4 |
| NM_002664          | PLEK      | pleckstrin                                                                      | -8.4 |
| NM_001166215       | S1PR5     | sphingosine-1-phosphate receptor 5                                              | -8.3 |
| NM_006144          | GZMA      | granzyme A                                                                      | -7.7 |
| NM_013351          | TBX21     | T-box 21                                                                        | -7.4 |
| OTTHUMT00000410673 | TRDJ1     | T cell receptor delta joining 1                                                 | -7.3 |
| NM_001083116       | PRF1      | perforin 1 (pore forming protein)                                               | -7.2 |
| NR_028092          | LPAL2     | lipoprotein, Lp(a)-like 2, pseudogene                                           | -7.1 |
| NM_001178015       | SLC4A10   | solute carrier family 4, sodium bicarbonate transporter, member 10              | -6.7 |
| NM_015103          | PLXND1    | plexin D1                                                                       | -6.6 |
| NM_030797          | FAM49A    | family with sequence similarity 49, member A                                    | -6.5 |
| BC072396           | TRGV9     | T cell receptor gamma variable 9                                                | -6.5 |
| NM_001031804       | MAF       | v-maf avian musculoaponeurotic fibrosarcoma oncogene homolog                    | -6.5 |
| NM_001302758       | GNLY      | granulysin                                                                      | -6.5 |
| NM_001005505       | CACNA2D2  | calcium channel, voltage-dependent, alpha 2/delta subunit 2                     | -6.4 |
| NM_001282588       | SLAMF7    | SLAM family member 7                                                            | -6.4 |
| NM_015868          | KIR2DL3   | killer cell immunoglobulin-like receptor, two domains, long cytoplasmic tail, 3 | -6.4 |
| NM_019111          | HLA-DRA   | major histocompatibility complex, class II, DR alpha                            | -6.3 |
| NR_047529          | SIGLEC17P | sialic acid binding Ig-like lectin 17, pseudogene                               | -6.2 |
| NM_003650          | CST7      | cystatin F (leukocystatin)                                                      | -6.0 |
| OTTHUMT00000338835 | TRGJP1    | T cell receptor gamma joining P1                                                | -6.0 |
| NM_001195683       | TGFBR3    | transforming growth factor beta receptor III                                    | -6.0 |

|                    |         |                                                                                  |      |
|--------------------|---------|----------------------------------------------------------------------------------|------|
| NM_030806          | C1orf21 | chromosome 1 open reading frame 21                                               | -5.8 |
| NM_000953          | PTGDR   | prostaglandin D2 receptor (DP)                                                   | -5.7 |
| NM_014512          | KIR2DS1 | killer cell immunoglobulin-like receptor, two domains, short cytoplasmic tail, 1 | -5.6 |
| NM_000887          | ITGAX   | integrin alpha X                                                                 | -5.6 |
| OTTHUMT00000338399 | TRGV8   | T cell receptor gamma variable 8                                                 | -5.6 |
| NM_015192          | PLCB1   | phospholipase C, beta 1 (phosphoinositide-specific)                              | -5.5 |
| NM_001004310       | FCRL6   | Fc receptor-like 6                                                               | -5.4 |
| NM_001256841       | CD300A  | CD300a molecule                                                                  | -5.4 |
| NM_024329          | EFHD2   | EF-hand domain family member D2                                                  | -5.3 |
| NM_001080416       | MYBL1   | v-myb avian myeloblastosis viral oncogene homolog-like 1                         | -5.2 |
| NM_152309          | PIK3AP1 | phosphoinositide-3-kinase adaptor protein 1                                      | -5.2 |
| NM_001081955       | RGS9    | regulator of G-protein signaling 9                                               | -5.1 |
| NM_012335          | MYO1F   | myosin IF                                                                        | -5.1 |
| NM_001123041       | CCR2    | chemokine (C-C motif) receptor 2                                                 | -5.0 |
| NM_001244134       | MAP3K8  | mitogen-activated protein kinase kinase kinase 8                                 | -5.0 |
| NM_001081573       | GAB3    | GRB2-associated binding protein 3                                                | -5.0 |
| NM_001105244       | PTPRM   | protein tyrosine phosphatase, receptor type, M                                   | -4.9 |
| NM_152501          | PYHIN1  | pyrin and HIN domain family, member 1                                            | -4.8 |
| XM_011519310       | MAP3K8  | mitogen-activated protein kinase kinase kinase 8                                 | -4.8 |
| NM_005810          | KLRG1   | killer cell lectin-like receptor subfamily G, member 1                           | -4.8 |
| NM_001171653       | ZEB2    | zinc finger E-box binding homeobox 2                                             | -4.8 |
| NM_001173514       | TYROBP  | TYRO protein tyrosine kinase binding protein                                     | -4.7 |
| NM_000634          | CXCR1   | chemokine (C-X-C motif) receptor 1                                               | -4.7 |
| NM_004163          | RAB27B  | RAB27B, member RAS oncogene family                                               | -4.7 |
| NM_001270934       | JAKMIP2 | janus kinase and microtubule interacting protein 2                               | -4.7 |
| NM_001111097       | LYN     | LYN proto-oncogene, Src family tyrosine kinase                                   | -4.7 |

|                    |          |                                                                                 |      |
|--------------------|----------|---------------------------------------------------------------------------------|------|
| NR_026971          | A2M-AS1  | A2M antisense RNA 1 (head to head)                                              | -4.6 |
| OTTHUMT00000338419 | TRGV2    | T cell receptor gamma variable 2                                                | -4.6 |
| OTTHUMT00000351239 | TRBV6-4  | T cell receptor beta variable 6-4                                               | -4.5 |
| M13231             | TRGC2    | T cell receptor gamma constant 2                                                | -4.5 |
| BC072387           | TRGV9    | T cell receptor gamma variable 9                                                | -4.5 |
| NM_001303103       | TLE1     | transducin-like enhancer of split 1 (E(sp1) homolog, Drosophila)                | -4.4 |
| NM_001291468       | CCL4L2   | chemokine (C-C motif) ligand 4-like 2                                           | -4.4 |
| NM_001304376       | ADGRG5   | adhesion G protein-coupled receptor G5                                          | -4.4 |
| NM_001301029       | USP28    | ubiquitin specific peptidase 28                                                 | -4.3 |
| NM_152353          | CLDND2   | claudin domain containing 2                                                     | -4.3 |
| NM_002661          | PLCG2    | phospholipase C, gamma 2 (phosphatidylinositol-specific)                        | -4.3 |
| NM_001166663       | CD244    | CD244 molecule, natural killer cell receptor 2B4                                | -4.2 |
| NM_004775          | B4GALT6  | UDP-Gal:betaGlcNAc beta 1,4-galactosyltransferase, polypeptide 6                | -4.2 |
| NM_003670          | BHLHE40  | basic helix-loop-helix family, member e40                                       | -4.2 |
| NM_001081455       | P2RY14   | purinergic receptor P2Y, G-protein coupled, 14                                  | -4.2 |
| NM_021822          | APOBEC3G | apolipoprotein B mRNA editing enzyme, catalytic polypeptide-like 3G             | -4.2 |
| NM_000615          | NCAM1    | neural cell adhesion molecule 1                                                 | -4.1 |
| OTTHUMT00000338828 | TRGJP2   | T cell receptor gamma joining P2                                                | -4.1 |
| NM_016616          | NME8     | NME/NM23 family member 8                                                        | -4.1 |
| NM_014219          | KIR2DL2  | killer cell immunoglobulin-like receptor, two domains, long cytoplasmic tail, 2 | -4.1 |
| NM_001160167       | PRR5L    | proline rich 5 like                                                             | -4.1 |
| NM_000639          | FASLG    | Fas ligand (TNF superfamily, member 6)                                          | -4.0 |
| NM_001288973       | ADAM12   | ADAM metallopeptidase domain 12                                                 | -4.0 |
| OTTHUMT00000410934 | TRDJ2    | T cell receptor delta joining 2                                                 | -4.0 |

|                    |          |                                                                                         |             |
|--------------------|----------|-----------------------------------------------------------------------------------------|-------------|
| NM_002609          | PDGFRB   | platelet-derived growth factor receptor, beta polypeptide                               | <b>-4.0</b> |
| OTTHUMT00000487452 | CCL4L1   | chemokine (C-C motif) ligand 4-like 1                                                   | <b>-4.0</b> |
| NM_003373          | VCL      | vinculin                                                                                | <b>-4.0</b> |
| NM_001004470       | ST8SIA6  | ST8 alpha-N-acetyl-neuraminide alpha-2,8-sialyltransferase 6                            | <b>-3.9</b> |
| NM_004924          | ACTN4    | actinin, alpha 4                                                                        | <b>-3.9</b> |
| NM_001098484       | SLC4A4   | solute carrier family 4 (sodium bicarbonate cotransporter), member 4                    | <b>-3.9</b> |
| NM_181791          | GPR141   | G protein-coupled receptor 141                                                          | <b>-3.9</b> |
| NM_001278182       | EOMES    | eomesodermin                                                                            | <b>-3.9</b> |
| NM_020988          | GNAO1    | guanine nucleotide binding protein (G protein), alpha activating activity polypeptide O | <b>-3.9</b> |
| NM_014762          | DHCR24   | 24-dehydrocholesterol reductase                                                         | <b>-3.8</b> |
| NM_001017403       | LGR6     | leucine-rich repeat containing G protein-coupled receptor 6                             | <b>-3.8</b> |
| NM_006056          | NMUR1    | neuromedin U receptor 1                                                                 | <b>-3.8</b> |
| NM_000619          | IFNG     | interferon, gamma                                                                       | <b>-3.8</b> |
| NM_033071          | SYNE1    | spectrin repeat containing, nuclear envelope 1                                          | <b>-3.8</b> |
| NM_001042729       | FGR      | FGR proto-oncogene, Src family tyrosine kinase                                          | <b>-3.8</b> |
| NM_014729          | TOX      | thymocyte selection-associated high mobility group box                                  | <b>-3.8</b> |
| NM_006682          | FGL2     | fibrinogen-like 2                                                                       | <b>-3.7</b> |
| NM_000302          | PLOD1    | procollagen-lysine, 2-oxoglutarate 5-dioxygenase 1                                      | <b>-3.7</b> |
| NM_001171171       | CX3CR1   | chemokine (C-X3-C motif) receptor 1                                                     | <b>-3.7</b> |
| NM_007053          | CD160    | CD160 molecule                                                                          | <b>-3.7</b> |
| NM_001270526       | STOM     | stomatin                                                                                | <b>-3.7</b> |
| NM_032428          | FRMPD3   | FERM and PDZ domain containing 3                                                        | <b>-3.7</b> |
| NM_001001523       | RORC     | RAR-related orphan receptor C                                                           | <b>-3.7</b> |
| NM_024310          | PLEKHF1  | pleckstrin homology domain containing, family F (with FYVE domain) member 1             | <b>-3.7</b> |
| NM_001100398       | RAP1GAP2 | RAP1 GTPase activating protein 2                                                        | <b>-3.6</b> |

|              |          |                                                                  |      |
|--------------|----------|------------------------------------------------------------------|------|
| NM_004776    | B4GALT5  | UDP-Gal:betaGlcNAc beta 1,4-galactosyltransferase, polypeptide 5 | -3.6 |
| NM_002261    | KLRC3    | killer cell lectin-like receptor subfamily C, member 3           | -3.6 |
| NM_001308315 | TSPAN2   | tetraspanin 2                                                    | -3.6 |
| BC072387     | TRGV9    | T cell receptor gamma variable 9                                 | -3.6 |
| NM_001098802 | CEP78    | centrosomal protein 78kDa                                        | -3.6 |
| NM_001145199 | C12orf75 | chromosome 12 open reading frame 75                              | -3.6 |
| NM_001145457 | NCR1     | natural cytotoxicity triggering receptor 1                       | -3.5 |
| NM_001004431 | METRNL   | meteorin, glial cell differentiation regulator-like              | -3.5 |
| NM_001135685 | LTK      | leukocyte receptor tyrosine kinase                               | -3.5 |
| NM_052966    | FAM129A  | family with sequence similarity 129, member A                    | -3.5 |
| NM_013254    | TBK1     | TANK-binding kinase 1                                            | -3.4 |
| NM_001144822 | CD58     | CD58 molecule                                                    | -3.4 |
| NM_001145466 | NCR3     | natural cytotoxicity triggering receptor 3                       | -3.4 |
| NM_001311313 | F2R      | coagulation factor II (thrombin) receptor                        | -3.4 |
| NM_000271    | NPC1     | Niemann-Pick disease, type C1                                    | -3.4 |
| NM_001142343 | CMKLR1   | chemerin chemokine-like receptor 1                               | -3.3 |
| NR_004386    | RNU105B  | RNA, U105B small nucleolar                                       | -3.3 |
| NM_001037131 | AGAP1    | ArfGAP with GTPase domain, ankyrin repeat and PH domain 1        | -3.3 |
| BC039116     | TRGC2    | T cell receptor gamma constant 2                                 | -3.3 |
| NM_001162951 | SYTL2    | synaptotagmin-like 2                                             | -3.3 |
| NM_001282640 | SUSD1    | sushi domain containing 1                                        | -3.3 |
| NM_001001396 | ATP2B4   | ATPase, Ca <sup>++</sup> transporting, plasma membrane 4         | -3.3 |
| NM_017983    | WIPI1    | WD repeat domain, phosphoinositide interacting 1                 | -3.3 |

|                 |          |                                                                                   |      |
|-----------------|----------|-----------------------------------------------------------------------------------|------|
| NM_001159643    | MCTP2    | multiple C2 domains, transmembrane 2                                              | -3.3 |
| NM_001018011    | ZBTB16   | zinc finger and BTB domain containing 16                                          | -3.3 |
| NM_002964       | S100A8   | S100 calcium binding protein A8                                                   | -3.3 |
| NM_052939       | FCRL3    | Fc receptor-like 3                                                                | -3.3 |
| NM_020133       | AGPAT4   | 1-acylglycerol-3-phosphate O-acyltransferase 4                                    | -3.2 |
| NM_018644       | B3GAT1   | beta-1,3-glucuronyltransferase 1                                                  | -3.2 |
| NM_015166       | MLC1     | megalencephalic leukoencephalopathy with subcortical cysts 1                      | -3.2 |
| BC073897        | MXRA7    | matrix-remodelling associated 7                                                   | -3.2 |
| NM_145648       | SLC15A4  | solute carrier family 15 (oligopeptide transporter), member 4                     | -3.2 |
| NR_029683       | MIR142   | microRNA 142                                                                      | -3.2 |
| NM_001242867    | KIR3DL2  | killer cell immunoglobulin-like receptor, three domains, long cytoplasmic tail, 2 | -3.2 |
| NM_001243794    | CHST12   | carbohydrate (chondroitin 4) sulfotransferase 12                                  | -3.2 |
| NM_001066       | TNFRSF1B | tumor necrosis factor receptor superfamily, member 1B                             | -3.2 |
| NM_001282399    | IL18R1   | interleukin 18 receptor 1                                                         | -3.2 |
| NM_152280       | SYT11    | synaptotagmin XI                                                                  | -3.2 |
| NM_001433       | ERN1     | endoplasmic reticulum to nucleus signaling 1                                      | -3.2 |
| AF018171        | YME1L1   | YME1-like 1 ATPase                                                                | -3.2 |
| NM_004747       | DLG5     | discs, large homolog 5 (Drosophila)                                               | -3.1 |
| NM_017629       | AGO4     | argonaute RISC catalytic component 4                                              | -3.1 |
| ENST00000610437 | KIR3DL3  | killer cell immunoglobulin-like receptor, three domains, long cytoplasmic tail, 3 | -3.1 |
| NM_001161342    | TMEM171  | transmembrane protein 171                                                         | -3.1 |
| NM_016441       | CRIM1    | cysteine rich transmembrane BMP regulator 1 (chordin-like)                        | -3.1 |
| ENST00000394409 | PPP2R2B  | protein phosphatase 2, regulatory subunit B, beta                                 | -3.1 |

|                 |            |                                                                                  |      |
|-----------------|------------|----------------------------------------------------------------------------------|------|
| NM_001114173    | CTSC       | cathepsin C                                                                      | -3.1 |
| NM_012313       | KIR2DS3    | killer cell immunoglobulin-like receptor, two domains, short cytoplasmic tail, 3 | -3.1 |
| NM_001126128    | PROK2      | prokineticin 2                                                                   | -3.0 |
| NM_020733       | HEG1       | heart development protein with EGF-like domains 1                                | -3.0 |
| NM_001282971    | MTSS1      | metastasis suppressor 1                                                          | -3.0 |
| NM_001284194    | FUT11      | fucosyltransferase 11 (alpha (1,3) fucosyltransferase)                           | -3.0 |
| NM_000246       | CIITA      | class II, major histocompatibility complex, transactivator                       | -3.0 |
| NM_002305       | LGALS1     | lectin, galactoside-binding, soluble, 1                                          | -3.0 |
| NM_001039547    | GK5        | glycerol kinase 5 (putative)                                                     | -3.0 |
| NM_000397       | CYBB       | cytochrome b-245, beta polypeptide                                               | -3.0 |
| NM_001282862    | RASGEF1A   | RasGEF domain family member 1A                                                   | -3.0 |
| NR_024277       | AGPAT4-IT1 | AGPAT4 intronic transcript 1                                                     | -3.0 |
| NM_017931       | TTC38      | tetratricopeptide repeat domain 38                                               | -3.0 |
| NM_022365       | DNAJC1     | DnaJ (Hsp40) homolog, subfamily C, member 1                                      | -3.0 |
| NM_003265       | TLR3       | toll-like receptor 3                                                             | -3.0 |
| NR_003573       | ANXA2P2    | annexin A2 pseudogene 2                                                          | -2.9 |
| NM_001256574    | ENC1       | ectodermal-neural cortex 1 (with BTB domain)                                     | -2.9 |
| NM_001198       | PRDM1      | PR domain containing 1, with ZNF domain                                          | -2.9 |
| NM_001300899    | MYO6       | myosin VI                                                                        | -2.9 |
| NM_199280       | FAM179A    | family with sequence similarity 179, member A                                    | -2.9 |
| NM_001301036    | TMCC3      | transmembrane and coiled-coil domain family 3                                    | -2.9 |
| NM_004227       | CYTH3      | cytohesin 3                                                                      | -2.9 |
| NM_001061       | TBXAS1     | thromboxane A synthase 1 (platelet)                                              | -2.9 |
| ENST00000598878 | METTL6     | methyltransferase like 6                                                         | -2.9 |
| NM_001015002    | LLGL2      | lethal giant larvae homolog 2 (Drosophila)                                       | -2.9 |
| NM_021033       | RAP2A      | RAP2A, member of RAS oncogene family                                             | -2.9 |
| NM_001104544    | TMEM255A   | transmembrane protein 255A                                                       | -2.9 |



|              |          |                                                                               |      |
|--------------|----------|-------------------------------------------------------------------------------|------|
| NM_001142650 | HNRNPLL  | heterogeneous nuclear ribonucleoprotein L-like                                | -2.8 |
| NM_024630    | ZDHHC14  | zinc finger, DHHC-type containing 14                                          | -2.8 |
| NM_001304448 | KLRC1    | killer cell lectin-like receptor subfamily C, member 1                        | -2.8 |
| XR_251175    | FAR2P3   | fatty acyl-CoA reductase 2 pseudogene 3                                       | -2.8 |
| NM_015175    | NBEAL2   | neurobeachin like 2                                                           | -2.8 |
| NM_020531    | APMAP    | adipocyte plasma membrane associated protein                                  | -2.8 |
| NM_001290072 | ENPP5    | ectonucleotide pyrophosphatase/phosphodiesterase 5 (putative)                 | -2.8 |
| NM_014508    | APOBEC3C | apolipoprotein B mRNA editing enzyme, catalytic polypeptide-like 3C           | -2.8 |
| NM_001261825 | OASL     | 2-5-oligoadenylate synthetase-like                                            | -2.7 |
| NR_030618    | MIR873   | microRNA 873                                                                  | -2.7 |
| NM_025208    | PDGFD    | platelet derived growth factor D                                              | -2.7 |
| NM_001308147 | PLEKHG3  | pleckstrin homology domain containing, family G (with RhoGef domain) member 3 | -2.7 |
| NM_001013627 | NHSL2    | NHS-like 2                                                                    | -2.7 |
| NM_001134486 | GBP5     | guanylate binding protein 5                                                   | -2.7 |
| NM_182523    | CMC1     | C-x(9)-C motif containing 1                                                   | -2.7 |
| NM_024940    | DOCK5    | dedicator of cytokinesis 5                                                    | -2.7 |
| NM_024830    | LPCAT1   | lysophosphatidylcholine acyltransferase 1                                     | -2.7 |
| NM_001131008 | PTPN12   | protein tyrosine phosphatase, non-receptor type 12                            | -2.7 |
| NR_120609    | GOLGA2P6 | golgin A2 pseudogene 6                                                        | -2.7 |
| NM_001145112 | PATL2    | protein associated with topoisomerase II homolog 2 (yeast)                    | -2.7 |
| NM_001135186 | ABI3     | ABI family, member 3                                                          | -2.6 |
| NM_018181    | ZNF532   | zinc finger protein 532                                                       | -2.6 |
| NM_001114759 | ZNF683   | zinc finger protein 683                                                       | -2.6 |
| NM_001193431 | PTPN22   | protein tyrosine phosphatase, non-receptor type                               | -2.6 |

|              |          |                                                                                             |      |
|--------------|----------|---------------------------------------------------------------------------------------------|------|
|              |          | 22 (lymphoid)                                                                               |      |
| NM_001282663 | MICAL2   | microtubule associated monooxygenase, calponin and LIM domain containing 2                  | -2.6 |
| NM_001033044 | GLUL     | glutamate-ammonia ligase                                                                    | -2.6 |
| NM_001258214 | IL12RB2  | interleukin 12 receptor, beta 2                                                             | -2.6 |
| NM_001277201 | SIGLEC7  | sialic acid binding Ig-like lectin 7                                                        | -2.6 |
| NM_002104    | GZMK     | granzyme K                                                                                  | -2.6 |
| NM_003974    | DOK2     | docking protein 2                                                                           | -2.6 |
| NM_000074    | CD40LG   | CD40 ligand                                                                                 | -2.6 |
| NM_003608    | GPR65    | G protein-coupled receptor 65                                                               | -2.6 |
| NM_001127714 | HIVEP3   | human immunodeficiency virus type I enhancer binding protein 3                              | -2.6 |
| NM_001143976 | WEE1     | WEE1 G2 checkpoint kinase                                                                   | -2.6 |
| NM_022140    | EPB41L4A | erythrocyte membrane protein band 4.1 like 4A                                               | -2.6 |
| NM_002378    | MATK     | megakaryocyte-associated tyrosine kinase                                                    | -2.6 |
| NM_013308    | GPR171   | G protein-coupled receptor 171                                                              | -2.6 |
| NM_018438    | FBXO6    | F-box protein 6                                                                             | -2.6 |
| NM_001135731 | ZMAT4    | zinc finger, matrin-type 4                                                                  | -2.6 |
| NR_026716    | KIR3DX1  | killer cell immunoglobulin-like receptor, three domains, X1                                 | -2.6 |
| NM_005677    | COLQ     | collagen-like tail subunit (single strand of homotrimer) of asymmetric acetylcholinesterase | -2.6 |
| NM_014572    | LATS2    | large tumor suppressor kinase 2                                                             | -2.5 |
| NM_002260    | KLRC2    | killer cell lectin-like receptor subfamily C, member 2                                      | -2.5 |
| NM_001289999 | NFIL3    | nuclear factor, interleukin 3 regulated                                                     | -2.5 |
| NM_001261835 | BZRAP1   | benzodiazepine receptor (peripheral) associated protein 1                                   | -2.5 |
| NM_005907    | MAN1A1   | mannosidase, alpha, class 1A, member 1                                                      | -2.5 |
| NM_001278736 | CCL5     | chemokine (C-C motif) ligand 5                                                              | -2.5 |
| NM_003246    | THBS1    | thrombospondin 1                                                                            | -2.5 |
| NM_173483    | CYP4F22  | cytochrome P450, family 4, subfamily F, polypeptide 22                                      | -2.5 |

|                    |          |                                                                         |      |
|--------------------|----------|-------------------------------------------------------------------------|------|
| NM_020453          | ATP10D   | ATPase, class V, type 10D                                               | -2.5 |
| NM_001173463       | KIF21A   | kinesin family member 21A                                               | -2.5 |
| NM_004106          | FCER1G   | Fc fragment of IgE, high affinity I, receptor for;<br>gamma polypeptide | -2.5 |
| NM_004482          | GALNT3   | polypeptide N-acetylgalactosaminyltransferase 3                         | -2.5 |
| NM_001303420       | COLGALT2 | collagen beta(1-O)galactosyltransferase 2                               | -2.5 |
| NM_001098503       | PTPRJ    | protein tyrosine phosphatase, receptor type, J                          | -2.5 |
| NM_001190821       | SMAD7    | SMAD family member 7                                                    | -2.5 |
| OTTHUMT00000338832 | TRGV10   | T cell receptor gamma variable 10 (non-<br>functional)                  | -2.5 |
| NM_012289          | KEAP1    | kelch-like ECH-associated protein 1                                     | -2.5 |
| NM_001335          | CTSW     | cathepsin W                                                             | -2.5 |
| NM_001114108       | TTC22    | tetratricopeptide repeat domain 22                                      | -2.4 |
| NM_004580          | RAB27A   | RAB27A, member RAS oncogene family                                      | -2.4 |
| NM_152781          | HEATR9   | HEAT repeat containing 9                                                | -2.4 |
| NM_001079526       | IKZF2    | IKAROS family zinc finger 2                                             | -2.4 |
| NM_013313          | YPEL1    | yippee like 1                                                           | -2.4 |
| NM_001100164       | PHACTR2  | phosphatase and actin regulator 2                                       | -2.4 |
| NM_001146032       | FCHO2    | FCH domain only 2                                                       | -2.4 |
| NR_028045          | KLRAP1   | killer cell lectin-like receptor subfamily A<br>pseudogene 1            | -2.4 |
| NM_153698          | AAED1    | AhpC/TSA antioxidant enzyme domain containing<br>1                      | -2.4 |
| NM_003037          | SLAMF1   | signaling lymphocytic activation molecule family<br>member 1            | -2.4 |
| NM_001191          | BCL2L1   | BCL2-like 1                                                             | -2.4 |
| NM_001079874       | VAV3     | vav 3 guanine nucleotide exchange factor                                | -2.4 |
| NM_001017373       | SAMD3    | sterile alpha motif domain containing 3                                 | -2.4 |
| NM_001145088       | TBC1D31  | TBC1 domain family, member 31                                           | -2.3 |
| OTTHUMT00000401873 | TRAV1-2  | T cell receptor alpha variable 1-2                                      | -2.3 |

|              |           |                                                                           |      |
|--------------|-----------|---------------------------------------------------------------------------|------|
| NR_039930    | MIR4772   | microRNA 4772                                                             | -2.3 |
| NM_001290023 | IL12RB1   | interleukin 12 receptor, beta 1                                           | -2.3 |
| NM_001243198 | HIP1      | huntingtin interacting protein 1                                          | -2.3 |
| NM_006564    | CXCR6     | chemokine (C-X-C motif) receptor 6                                        | -2.3 |
| NM_001136498 | CISD3     | CDGSH iron sulfur domain 3                                                | -2.3 |
| NM_001287010 | GLIPR2    | GLI pathogenesis-related 2                                                | -2.3 |
| NM_001127231 | AUTS2     | autism susceptibility candidate 2                                         | -2.3 |
| NM_001195059 | PLEKHO2   | pleckstrin homology domain containing, family O member 2                  | -2.3 |
| NM_004669    | CLIC3     | chloride intracellular channel 3                                          | -2.3 |
| NM_001316676 | PTPRE     | protein tyrosine phosphatase, receptor type, E                            | -2.3 |
| NM_015916    | CALHM2    | calcium homeostasis modulator 2                                           | -2.3 |
| NM_001197293 | DPYSL2    | dihydropyrimidinase-like 2                                                | -2.3 |
| NR_033651    | MSC-AS1   | MSC antisense RNA 1                                                       | -2.3 |
| NM_024430    | PSTPIP2   | proline-serine-threonine phosphatase interacting protein 2                | -2.3 |
| NM_000416    | IFNGR1    | interferon gamma receptor 1                                               | -2.3 |
| NM_000239    | LYZ       | lysozyme                                                                  | -2.3 |
| NM_016463    | CXXC5     | CXXC finger protein 5                                                     | -2.3 |
| NM_006111    | ACAA2     | acetyl-CoA acyltransferase 2                                              | -2.3 |
| NM_001166002 | APOBEC3H  | apolipoprotein B mRNA editing enzyme, catalytic polypeptide-like 3H       | -2.3 |
| NM_001223    | CASP1     | caspase 1                                                                 | -2.3 |
| NM_001184720 | GYG1      | glycogenin 1                                                              | -2.3 |
| NR_073415    | HSP90AB4P | heat shock protein 90kDa alpha (cytosolic), class B member 4, pseudogene  | -2.3 |
| NM_001122898 | CD99      | CD99 molecule                                                             | -2.3 |
| NM_000387    | SLC25A20  | solute carrier family 25 (carnitine/acylcarnitine translocase), member 20 | -2.2 |
| NM_001116    | ADCY9     | adenylate cyclase 9                                                       | -2.2 |
| NM_001099433 | JAKMIP1   | janus kinase and microtubule interacting protein 1                        | -2.2 |

|              |           |                                                                                                       |      |
|--------------|-----------|-------------------------------------------------------------------------------------------------------|------|
| NM_000153    | GALC      | galactosylceramidase                                                                                  | -2.2 |
| NM_001130831 | GAS7      | growth arrest-specific 7                                                                              | -2.2 |
| NM_001135553 | MKNK1     | MAP kinase interacting serine/threonine kinase 1                                                      | -2.2 |
| NM_001161748 | LIM2      | lens intrinsic membrane protein 2                                                                     | -2.2 |
| NM_001005498 | RHBDF2    | rhomboid 5 homolog 2 (Drosophila)                                                                     | -2.2 |
| NM_001282736 | PLXDC2    | plexin domain containing 2                                                                            | -2.2 |
| NM_003807    | TNFSF14   | tumor necrosis factor (ligand) superfamily, member 14                                                 | -2.2 |
| NM_024605    | ARHGAP10  | Rho GTPase activating protein 10                                                                      | -2.2 |
| NM_001006636 | GTDC1     | glycosyltransferase like domain containing 1                                                          | -2.2 |
| NM_198485    | TPRG1     | tumor protein p63 regulated 1                                                                         | -2.2 |
| NM_001257389 | CD63      | CD63 molecule                                                                                         | -2.2 |
| NM_020856    | TSHZ3     | teashirt zinc finger homeobox 3                                                                       | -2.2 |
| NM_004419    | DUSP5     | dual specificity phosphatase 5                                                                        | -2.2 |
| NM_000954    | PTGDS     | prostaglandin D2 synthase 21kDa (brain)                                                               | -2.2 |
| NM_002432    | MNDA      | myeloid cell nuclear differentiation antigen                                                          | -2.2 |
| NM_001293178 | PRSS23    | protease, serine, 23                                                                                  | -2.2 |
| NR_006881    | SNORD3C   | small nucleolar RNA, C/D box 3C                                                                       | -2.2 |
| NM_003175    | XCL2      | chemokine (C motif) ligand 2                                                                          | -2.2 |
| NM_001010863 | C10orf128 | chromosome 10 open reading frame 128                                                                  | -2.2 |
| NM_001177506 | AOAH      | acyloxyacyl hydrolase (neutrophil)                                                                    | -2.2 |
| NM_001142339 | GNAL      | guanine nucleotide binding protein (G protein), alpha activating activity polypeptide, olfactory type | -2.2 |
| NM_001154    | ANXA5     | annexin A5                                                                                            | -2.2 |
| NM_001244871 | DAB2      | Dab, mitogen-responsive phosphoprotein, homolog 2 (Drosophila)                                        | -2.2 |
| NM_014661    | FAM53B    | family with sequence similarity 53, member B                                                          | -2.2 |
| XM_011530934 | NHSL2     | NHS-like 2                                                                                            | -2.2 |

|              |             |                                                                                    |      |
|--------------|-------------|------------------------------------------------------------------------------------|------|
| NM_004054    | C3AR1       | complement component 3a receptor 1                                                 | -2.2 |
| NM_001198665 | ARHGEF12    | Rho guanine nucleotide exchange factor (GEF) 12                                    | -2.2 |
| NM_004522    | KIF5C       | kinesin family member 5C                                                           | -2.2 |
| NM_001111307 | PDE4A       | phosphodiesterase 4A, cAMP-specific                                                | -2.2 |
| NM_001303126 | RHEBL1      | Ras homolog enriched in brain like 1                                               | -2.1 |
| NM_138801    | GALM        | galactose mutarotase (aldose 1-epimerase)                                          | -2.1 |
| NM_001669    | ARSD        | arylsulfatase D                                                                    | -2.1 |
| NM_198147    | ABHD15      | abhydrolase domain containing 15                                                   | -2.1 |
| NM_001145725 | LYAR        | Ly1 antibody reactive                                                              | -2.1 |
| NM_001291695 | KIR2DS2     | killer cell immunoglobulin-like receptor, two domains, short cytoplasmic tail, 2   | -2.1 |
| NM_033515    | ARHGAP18    | Rho GTPase activating protein 18                                                   | -2.1 |
| NM_006332    | IFI30       | interferon, gamma-inducible protein 30                                             | -2.1 |
| NM_001083539 | KIR3DS1     | killer cell immunoglobulin-like receptor, three domains, short cytoplasmic tail, 1 | -2.1 |
| NM_001110556 | FLNA        | filamin A, alpha                                                                   | -2.1 |
| NR_003341    | SNORD116-27 | small nucleolar RNA, C/D box 116-27                                                | -2.1 |
| NM_003764    | STX11       | syntaxin 11                                                                        | -2.1 |
| NR_040102    | FLJ33581    | uncharacterized LOC400839                                                          | -2.1 |
| NM_014957    | DENND3      | DENN/MADD domain containing 3                                                      | -2.1 |
| NM_002395    | ME1         | malic enzyme 1, NADP(+)-dependent, cytosolic                                       | -2.1 |
| NM_015230    | ARAP2       | ArfGAP with RhoGAP domain, ankyrin repeat and PH domain 2                          | -2.1 |

|                    |          |                                                                                 |      |
|--------------------|----------|---------------------------------------------------------------------------------|------|
| NM_001775          | CD38     | CD38 molecule                                                                   | -2.1 |
| NM_001114380       | ITGAL    | integrin alpha L                                                                | -2.1 |
| NM_001184714       | SLAMF6   | SLAM family member 6                                                            | -2.1 |
| NM_001136190       | LAX1     | lymphocyte transmembrane adaptor 1                                              | -2.1 |
| NM_006750          | SNTB2    | syntrophin, beta 2 (dystrophin-associated protein A1, 59kDa, basic component 2) | -2.1 |
| NM_000564          | IL5RA    | interleukin 5 receptor, alpha                                                   | -2.1 |
| NM_031459          | SESN2    | sestrin 2                                                                       | -2.1 |
| OTTHUMT00000401536 | TRDV3    | T cell receptor delta variable 3                                                | -2.1 |
| NM_001195328       | RAB9A    | RAB9A, member RAS oncogene family                                               | -2.1 |
| NM_014822          | SEC24D   | SEC24 homolog D, COPII coat complex component                                   | -2.1 |
| NR_036188          | MIR4302  | microRNA 4302                                                                   | -2.1 |
| NR_046764          | AOAH-IT1 | AOAH intronic transcript 1                                                      | -2.1 |
| NM_006871          | RIPK3    | receptor-interacting serine-threonine kinase 3                                  | -2.1 |
| NM_001204897       | TM4SF19  | transmembrane 4 L six family member 19                                          | -2.1 |
| NM_001114172       | PIK3R3   | phosphoinositide-3-kinase, regulatory subunit 3 (gamma)                         | -2.1 |
| NM_014899          | RHOBTB3  | Rho-related BTB domain containing 3                                             | -2.1 |
| NM_014218          | KIR2DL1  | killer cell immunoglobulin-like receptor, two domains, long cytoplasmic tail, 1 | -2.1 |
| NM_0011109         | ADAM8    | ADAM metallopeptidase domain 8                                                  | -2.1 |
| NM_133494          | NEK7     | NIMA-related kinase 7                                                           | -2.1 |
| NM_001193380       | IL17RE   | interleukin 17 receptor E                                                       | -2.0 |

|              |          |                                                                  |      |
|--------------|----------|------------------------------------------------------------------|------|
| NM_001620    | AHNAK    | AHNAK nucleoprotein                                              | -2.0 |
| NM_001128325 | SPON2    | spondin 2, extracellular matrix protein                          | -2.0 |
| XM_011521475 | ANXA2    | annexin A2                                                       | -2.0 |
| NM_001040697 | UEVLD    | UEV and lactate/malate dehydrogenase domains                     | -2.0 |
| NM_001242628 | GFOD1    | glucose-fructose oxidoreductase domain containing 1              | -2.0 |
| NM_001008949 | ITPRIPL1 | inositol 1,4,5-trisphosphate receptor interacting protein-like 1 | -2.0 |
| NM_001142523 | IRAK3    | interleukin 1 receptor associated kinase 3                       | -2.0 |
| NM_001130110 | SETBP1   | SET binding protein 1                                            | -2.0 |
| NM_001005862 | ERBB2    | erb-b2 receptor tyrosine kinase 2                                | -2.0 |
| NM_003870    | IQGAP1   | IQ motif containing GTPase activating protein 1                  | -2.0 |
| NM_013233    | STK39    | serine threonine kinase 39                                       | -2.0 |
| NM_021156    | TMX4     | thioredoxin-related transmembrane protein 4                      | -2.0 |
| NM_001099455 | CPPED1   | calcineurin-like phosphoesterase domain containing 1             | -2.0 |
| NM_001195243 | SMKR1    | small lysine-rich protein 1                                      | -2.0 |
| NM_015180    | SYNE2    | spectrin repeat containing, nuclear envelope 2                   | -2.0 |
| NM_001253835 | IGFBP7   | insulin like growth factor binding protein 7                     | -2.0 |
| NM_175617    | MT1E     | metallothionein 1E                                               | -2.0 |
| NM_001143821 | PLEKHA5  | pleckstrin homology domain containing, family A member 5         | -2.0 |
| NM_000594    | TNF      | tumor necrosis factor                                            | -2.0 |
| NM_001303512 | PDZD4    | PDZ domain containing 4                                          | -2.0 |



|              |            |                                                       |      |
|--------------|------------|-------------------------------------------------------|------|
| NM_024576    | OGFRL1     | opioid growth factor receptor-like 1                  | -2.0 |
| NM_012383    | OSTF1      | osteoclast stimulating factor 1                       | -2.0 |
| NM_001278557 | WSB2       | WD repeat and SOCS box containing 2                   | -2.0 |
| NM_000878    | IL2RB      | interleukin 2 receptor, beta                          | -2.0 |
| NM_001198801 | EIF4G3     | eukaryotic translation initiation factor 4 gamma, 3   | -2.0 |
| NM_001039477 | THEMIS2    | thymocyte selection associated family member 2        | -2.0 |
| NM_001123375 | HIST2H3D   | histone cluster 2, H3d                                | -2.0 |
| NM_006786    | UTS2       | urotensin 2                                           | -2.0 |
| NM_000101    | CYBA       | cytochrome b-245, alpha polypeptide                   | -2.0 |
| NM_002121    | HLA-DPB1   | major histocompatibility complex, class II, DP beta 1 | -2.0 |
| NM_001042473 | ACBD5      | acyl-CoA binding domain containing 5                  | -2.0 |
| NR_108036    | CFAP58-AS1 | CFAP58 antisense RNA 1 (head to head)                 | -2.0 |
| NM_001206567 | IFI16      | interferon, gamma-inducible protein 16                | -2.0 |
| NM_001008211 | OPTN       | optineurin                                            | -2.0 |
| NM_015550    | OSBPL3     | oxysterol binding protein-like 3                      | -2.0 |
| NM_001042576 | RRBP1      | ribosome binding protein 1                            | -2.0 |
| NM_001013742 | DGKK       | diacylglycerol kinase, kappa                          | -2.0 |
| NM_001206957 | RASSF1     | Ras association (RalGDS/AF-6) domain family member 1  | -2.0 |
| NM_001204406 | ALOX5AP    | arachidonate 5-lipoxygenase-activating protein        | -2.0 |
| NM_145798    | OSBPL7     | oxysterol binding protein-like 7                      | -2.0 |

|                    |         |                                                     |      |
|--------------------|---------|-----------------------------------------------------|------|
| NM_001100422       | SPATS2L | spermatogenesis associated, serine-rich 2-like      | -2.0 |
| NM_001009998       | SSBP4   | single stranded DNA binding protein 4               | -2.0 |
| NM_001285460       | IQGAP2  | IQ motif containing GTPase activating protein 2     | -2.0 |
| NM_001171971       | CDHR1   | cadherin-related family member 1                    | -2.0 |
| NM_001199775       | CPD     | carboxypeptidase D                                  | -2.0 |
| NM_021205          | RHOU    | ras homolog family member U                         | -2.0 |
| NM_001142276       | APLP2   | amyloid beta (A4) precursor-like protein 2          | -2.0 |
| NM_001084          | PLOD3   | procollagen-lysine, 2-oxoglutarate 5-dioxygenase 3  | -2.0 |
| NM_001172411       | VANGL1  | VANGL planar cell polarity protein 1                | -2.0 |
| NM_000527          | LDLR    | low density lipoprotein receptor                    | -2.0 |
| NM_001030288       | SPN     | sialophorin                                         | -1.9 |
| NM_001130916       | TGFBR1  | transforming growth factor, beta receptor 1         | -1.9 |
| NM_001606          | ABCA2   | ATP binding cassette subfamily A member 2           | -1.9 |
| NM_006851          | GLIPR1  | GLI pathogenesis-related 1                          | -1.9 |
| NM_004346          | CASP3   | caspase 3                                           | -1.9 |
| NM_001297576       | PEA15   | phosphoprotein enriched in astrocytes 15            | -1.9 |
| NM_013368          | SERTAD3 | SERTA domain containing 3                           | -1.9 |
| NM_001142864       | PIEZO1  | piezo-type mechanosensitive ion channel component 1 | -1.9 |
| NM_001128203       | PLA2G16 | phospholipase A2, group XVI                         | -1.9 |
| OTTHUMT00000060170 | CHST12  | carbohydrate (chondroitin 4) sulfotransferase 12    | -1.9 |

|              |          |                                                                     |      |
|--------------|----------|---------------------------------------------------------------------|------|
| NM_001172623 | NEO1     | neogenin 1                                                          | -1.9 |
| NM_001283018 | NAPB     | N-ethylmaleimide-sensitive factor attachment protein, beta          | -1.9 |
| NM_001178138 | TFDP2    | transcription factor Dp-2 (E2F dimerization partner 2)              | -1.9 |
| NM_198457    | ZNF600   | zinc finger protein 600                                             | -1.9 |
| NM_000944    | PPP3CA   | protein phosphatase 3, catalytic subunit, alpha isozyme             | -1.9 |
| NM_001145144 | SLC1A5   | solute carrier family 1 (neutral amino acid transporter), member 5  | -1.9 |
| NM_001145044 | SLCO3A1  | solute carrier organic anion transporter family, member 3A1         | -1.9 |
| NM_152426    | APOBEC3D | apolipoprotein B mRNA editing enzyme, catalytic polypeptide-like 3D | -1.9 |
| NM_002124    | HLA-DRB1 | major histocompatibility complex, class II, DR beta 1               | -1.9 |
| NM_030978    | ARPC5L   | actin related protein 2/3 complex subunit 5-like                    | -1.9 |
| NM_017439    | GSAP     | gamma-secretase activating protein                                  | -1.9 |
| NM_005103    | FEZ1     | fasciculation and elongation protein zeta 1                         | -1.9 |
| NM_001102592 | HENMT1   | HEN1 methyltransferase homolog 1 (Arabidopsis)                      | -1.9 |
| NM_001244938 | TXN      | thioredoxin                                                         | -1.9 |
| NM_153690    | FAM43A   | family with sequence similarity 43, member A                        | -1.9 |
| NM_007207    | DUSP10   | dual specificity phosphatase 10                                     | -1.9 |
| NM_006399    | BATF     | basic leucine zipper transcription factor, ATF-like                 | -1.9 |
| NM_001199797 | PTPN7    | protein tyrosine phosphatase, non-receptor type 7                   | -1.9 |
| NM_001007269 | GEMIN7   | gem nuclear organelle associated protein 7                          | -1.9 |
| NM_005313    | PDIA3    | protein disulfide isomerase family A member 3                       | -1.9 |

|              |         |                                                            |             |
|--------------|---------|------------------------------------------------------------|-------------|
| NM_001135052 | SYK     | spleen tyrosine kinase                                     | <b>-1.9</b> |
| NM_001003962 | CAPNS1  | calpain, small subunit 1                                   | <b>-1.9</b> |
| NM_001311    | CRIP1   | cysteine-rich protein 1 (intestinal)                       | <b>-1.9</b> |
| NM_001122681 | SH3BP2  | SH3-domain binding protein 2                               | <b>-1.9</b> |
| NM_018990    | SASH3   | SAM and SH3 domain containing 3                            | <b>-1.9</b> |
| NM_024837    | ATP8B4  | ATPase, class I, type 8B, member 4                         | <b>-1.9</b> |
| NM_138441    | MB21D1  | Mab-21 domain containing 1                                 | <b>-1.9</b> |
| NM_001286715 | AGTPBP1 | ATP/GTP binding protein 1                                  | <b>-1.9</b> |
| NM_001042368 | RALGDS  | ral guanine nucleotide dissociation stimulator             | <b>-1.9</b> |
| NM_001160417 | ZBP1    | Z-DNA binding protein 1                                    | <b>-1.9</b> |
| NM_005415    | SLC20A1 | solute carrier family 20 (phosphate transporter), member 1 | <b>-1.9</b> |
| NM_001080480 | MBOAT1  | membrane bound O-acyltransferase domain containing 1       | <b>-1.9</b> |
| NM_020823    | TMEM181 | transmembrane protein 181                                  | <b>-1.9</b> |
| NM_018998    | FBXW5   | F-box and WD repeat domain containing 5                    | <b>-1.9</b> |
| NM_000876    | IGF2R   | insulin-like growth factor 2 receptor                      | <b>-1.9</b> |
| NM_018690    | APOBR   | apolipoprotein B receptor                                  | <b>-1.9</b> |
| NM_001001437 | CCL3L3  | chemokine (C-C motif) ligand 3-like 3                      | <b>-1.8</b> |
| NM_001042685 | LGALS9B | lectin, galactoside-binding, soluble, 9B                   | <b>-1.8</b> |
| NM_001174166 | SLC16A6 | solute carrier family 16, member 6                         | <b>-1.8</b> |
| NM_000637    | GSR     | glutathione reductase                                      | <b>-1.8</b> |

|              |           |                                                             |      |
|--------------|-----------|-------------------------------------------------------------|------|
| NM_001130721 | ELOVL6    | ELOVL fatty acid elongase 6                                 | -1.8 |
| NM_000576    | IL1B      | interleukin 1 beta                                          | -1.8 |
| NM_001289823 | FURIN     | furin (paired basic amino acid cleaving enzyme)             | -1.8 |
| NM_032016    | STARD3NL  | STARD3 N-terminal like                                      | -1.8 |
| NM_000660    | TGFB1     | transforming growth factor beta 1                           | -1.8 |
| NM_001161441 | SH2D2A    | SH2 domain containing 2A                                    | -1.8 |
| NM_014326    | DAPK2     | death-associated protein kinase 2                           | -1.8 |
| NM_003521    | HIST1H2BM | histone cluster 1, H2bm                                     | -1.8 |
| NM_000332    | ATXN1     | ataxin 1                                                    | -1.8 |
| NM_001304275 | RAPGEF1   | Rap guanine nucleotide exchange factor 1                    | -1.8 |
| NM_001127183 | CFLAR     | CASP8 and FADD like apoptosis regulator                     | -1.8 |
| NM_001127197 | ELF4      | E74-like factor 4 (ets domain transcription factor)         | -1.8 |
| NM_002727    | SRGN      | serglycin                                                   | -1.8 |
| NM_000259    | MYO5A     | myosin VA                                                   | -1.8 |
| NM_001035260 | VPS26A    | VPS26 retromer complex component A                          | -1.8 |
| NM_004759    | MAPKAPK2  | mitogen-activated protein kinase-activated protein kinase 2 | -1.8 |
| NM_002211    | ITGB1     | integrin beta 1                                             | -1.8 |
| NM_138426    | GLCCI1    | glucocorticoid induced 1                                    | -1.8 |
| NM_001206651 | SH3GLB1   | SH3-domain GRB2-like endophilin B1                          | -1.8 |
| NM_001308445 | NAA50     | N(alpha)-acetyltransferase 50, NatE catalytic subunit       | -1.8 |

|              |            |                                                                                               |      |
|--------------|------------|-----------------------------------------------------------------------------------------------|------|
| NM_000585    | IL15       | interleukin 15                                                                                | -1.8 |
| NM_004252    | SLC9A3R1   | solute carrier family 9, subfamily A (NHE3, cation proton antiporter 3), member 3 regulator 1 | -1.8 |
| NM_000956    | PTGER2     | prostaglandin E receptor 2                                                                    | -1.8 |
| NM_005923    | MAP3K5     | mitogen-activated protein kinase kinase kinase 5                                              | -1.8 |
| NM_001005176 | SP140      | SP140 nuclear body protein                                                                    | -1.8 |
| NM_033054    | MYO1G      | myosin IG                                                                                     | -1.8 |
| NM_001127361 | RNF19B     | ring finger protein 19B                                                                       | -1.8 |
| NM_001030272 | ARNTL      | aryl hydrocarbon receptor nuclear translocator-like                                           | -1.8 |
| NM_001204426 | LIMK1      | LIM domain kinase 1                                                                           | -1.8 |
| NM_001009991 | SYTL3      | synaptotagmin-like 3                                                                          | -1.8 |
| NR_038993    | ZBTB20-AS1 | ZBTB20 antisense RNA 1                                                                        | -1.8 |
| NM_005345    | HSPA1A     | heat shock 70kDa protein 1A                                                                   | -1.8 |
| NM_013436    | NCKAP1     | NCK-associated protein 1                                                                      | -1.8 |
| NM_001033553 | SPECC1     | sperm antigen with calponin homology and coiled-coil domains 1                                | -1.8 |
| NM_001042440 | CAST       | calpastatin                                                                                   | -1.8 |
| NM_001256763 | FAM49B     | family with sequence similarity 49, member B                                                  | -1.8 |
| NM_005127    | CLEC2B     | C-type lectin domain family 2, member B                                                       | -1.8 |
| NM_001135095 | FNDC3B     | fibronectin type III domain containing 3B                                                     | -1.8 |
| NM_000919    | PAM        | peptidylglycine alpha-amidating monooxygenase                                                 | -1.8 |
| NM_001690    | ATP6V1A    | ATPase, H <sup>+</sup> transporting, lysosomal 70kDa, V1 subunit A                            | -1.8 |

|                 |         |                                                                               |      |
|-----------------|---------|-------------------------------------------------------------------------------|------|
| NM_018268       | WDR41   | WD repeat domain 41                                                           | -1.8 |
| NM_001282710    | PQLC3   | PQ loop repeat containing 3                                                   | -1.8 |
| NM_006826       | YWHAQ   | tyrosine 3-monooxygenase/tryptophan 5-monooxygenase activation protein, theta | -1.8 |
| ENST00000564037 | GBP3    | guanylate binding protein 3                                                   | -1.8 |
| NM_001032282    | KLF10   | Kruppel-like factor 10                                                        | -1.7 |
| NM_016641       | GDE1    | glycerophosphodiester phosphodiesterase 1                                     | -1.7 |
| NM_198321       | GALNT10 | polypeptide N-acetylgalactosaminyltransferase 10                              | -1.7 |
| NM_001195215    | DENND1B | DENN/MADD domain containing 1B                                                | -1.7 |
| NM_001195200    | CCDC107 | coiled-coil domain containing 107                                             | -1.7 |
| NM_001301098    | ZBTB44  | zinc finger and BTB domain containing 44                                      | -1.7 |
| NM_016626       | MEX3C   | mex-3 RNA binding family member C                                             | -1.7 |
| NM_001136021    | NFATC2  | nuclear factor of activated T-cells, cytoplasmic, calcineurin-dependent 2     | -1.7 |
| NM_006729       | DIAPH2  | diaphanous-related formin 2                                                   | -1.7 |
| NR_026790       | HCG11   | HLA complex group 11 (non-protein coding)                                     | -1.7 |
| NM_000700       | ANXA1   | annexin A1                                                                    | -1.7 |
| NM_002907       | RECQL   | RecQ helicase-like                                                            | -1.7 |
| NM_001134870    | PPP1R18 | protein phosphatase 1, regulatory subunit 18                                  | -1.7 |
| NM_001146029    | SEMA7A  | semaphorin 7A, GPI membrane anchor (John Milton Hagen blood group)            | -1.7 |
| NM_001008660    | PICALM  | phosphatidylinositol binding clathrin assembly protein                        | -1.7 |
| NM_001303618    | CD226   | CD226 molecule                                                                | -1.7 |

|              |           |                                                                    |      |
|--------------|-----------|--------------------------------------------------------------------|------|
| NM_002444    | MSN       | moesin                                                             | -1.7 |
| NR_003271    | SNORD3B-1 | small nucleolar RNA, C/D box 3B-1                                  | -1.7 |
| NR_003271    | SNORD3B-1 | small nucleolar RNA, C/D box 3B-1                                  | -1.7 |
| NM_001284308 | ADAP1     | ArfGAP with dual PH domains 1                                      | -1.7 |
| NR_006880    | SNORD3A   | small nucleolar RNA, C/D box 3A                                    | -1.7 |
| NR_045116    | C5orf56   | chromosome 5 open reading frame 56                                 | -1.7 |
| NM_003884    | KAT2B     | K(lysine) acetyltransferase 2B                                     | -1.7 |
| NM_198281    | GPRIN3    | GPRIN family member 3                                              | -1.7 |
| NR_026755    | CYP4F29P  | cytochrome P450, family 4, subfamily F, polypeptide 29, pseudogene | -1.7 |
| NM_015016    | MAST3     | microtubule associated serine/threonine kinase 3                   | -1.7 |
| NM_001178055 | PARP8     | poly(ADP-ribose) polymerase family member 8                        | -1.7 |
| NR_030374    | MIR644A   | microRNA 644a                                                      | -1.7 |
| NM_000043    | FAS       | Fas cell surface death receptor                                    | -1.7 |
| NM_002003    | FCN1      | ficolin (collagen/fibrinogen domain containing) 1                  | -1.7 |
| NM_001280539 | RNF19A    | ring finger protein 19A, RBR E3 ubiquitin protein ligase           | -1.6 |
| NM_001257137 | ITCH      | itchy E3 ubiquitin protein ligase                                  | -1.6 |
| NM_003901    | SGPL1     | sphingosine-1-phosphate lyase 1                                    | -1.6 |
| NM_020857    | VPS18     | VPS18 CORVET/HOPS core subunit                                     | -1.6 |
| NM_001270679 | MCU       | mitochondrial calcium uniporter                                    | -1.6 |
| NM_194291    | TMEM65    | transmembrane protein 65                                           | -1.6 |



|              |           |                                                                                                |             |
|--------------|-----------|------------------------------------------------------------------------------------------------|-------------|
| NM_153259    | MCOLN2    | mucolipin 2                                                                                    | <b>-1.5</b> |
| NM_001284338 | NEDD4     | neural precursor cell expressed, developmentally down-regulated 4, E3 ubiquitin protein ligase | <b>-1.5</b> |
| NM_003486    | SLC7A5    | solute carrier family 7 (amino acid transporter light chain, L system), member 5               | <b>-1.5</b> |
| NM_001312653 | HIST1H2BK | histone cluster 1, H2bk                                                                        | <b>-1.5</b> |

---
